# Supplementary material for: S‐Nitrosoglutathione Reductase Deficiency Causes Aberrant Placental S‐Nitrosylation and Preeclampsia
Source: PubMed Central journal article supplement — J Am Heart Assoc. 2022 Feb 22;11(5):e024008. doi: 10.1161/JAHA.121.024008 (PMC9075059; doi:10.1161/jaha.121.024008), 2022-02-22
Supplement: JAH3-11-e024008-s001.pdf [file JAH3-11-e024008-s001.pdf]

# Supplemental Material

**Table S1. List of proteins nitrosylated in GSNOR<sup>-/-</sup> placentas as compared to B6 placentas determined using dual-labelling mass spectrometry analysis.** All SNOylated proteins were detected in at least 2 of 5 placentas/group. The number in the observation column is the number of placentas that showed expression of that particular SNOylated protein for that particular group.

| label | Uniprot Accession | SNO site | Protein name                                                                                                                                                                                                        | Log2 fold change vs background GSNOR <sup>-/-</sup> | observations |
|-------|-------------------|----------|---------------------------------------------------------------------------------------------------------------------------------------------------------------------------------------------------------------------|-----------------------------------------------------|--------------|
| HPDP  | Q99L04            | C10      | Dehydrogenase/reductase SDR family member 1                                                                                                                                                                         | 23.05415                                            | 2            |
| HPDP  | Q99MN1            | C432     | Lysine--tRNA ligase                                                                                                                                                                                                 | 22.7331744                                          | 2            |
| HPDP  | Q8C7R4            | C298     | Ubiquitin-like modifier-activating enzyme 6 (Ubiquitin-activating enzyme 6)                                                                                                                                         | 22.10295762                                         | 2            |
| HPDP  | Q8VC70            | C217     | RNA-binding motif, single-stranded-interacting                                                                                                                                                                      | 21.71700633                                         | 2            |
| HPDP  | Q9D1I5            | C168     | Methylmalonyl-CoA epimerase, mitochondrial                                                                                                                                                                          | 21.24558726                                         | 2            |
| HPDP  | Q9JIG4            | C419     | Protein phosphatase 1 regulatory subunit 3F (R3F)                                                                                                                                                                   | 20.95864848                                         | 2            |
| HPDP  | Q9EPK7            | C43      | Exportin-7 (Exp7) (Ran-binding protein 16)                                                                                                                                                                          | 20.94875308                                         | 2            |
| HPDP  | Q9QUI0            | C164     | Transforming protein RhoA                                                                                                                                                                                           | 20.91330254                                         | 2            |
| HPDP  | Q64514            | C967     | Tripeptidyl-peptidase 2 (TPP-2)                                                                                                                                                                                     | 20.80956501                                         | 2            |
| HPDP  | O70400            | C73      | PDZ and LIM domain protein 1 (C-terminal LIM domain protein 1) (Elfin) (LIM domain protein CLP-                                                                                                                     | 20.77362179                                         | 2            |
| HPDP  | P24270            | C232     | Catalase                                                                                                                                                                                                            | 20.71680767                                         | 2            |
| HPDP  | Q8BY89            | C401     | Choline transporter-like protein 2 (Solute carrier family 44 member 2)                                                                                                                                              | 20.70444271                                         | 2            |
| HPDP  | P61982            | C112     | 14-3-3 protein gamma [Cleaved into: 14-3-3 protein gamma, N-terminally processed]                                                                                                                                   | 20.6712323                                          | 2            |
| HPDP  | Q8VDD5            | C740     | Myosin-9 (Cellular myosin heavy chain, type A) (Myosin heavy chain 9) (Myosin heavy chain, non-muscle IIa) (Non-muscle myosin heavy chain A) (NMMHC-A) (Non-muscle myosin heavy chain IIa) (NMMHC II-a) (NMMHC-IIA) | 20.40955957                                         | 2            |
| HPDP  | P23198            | C177     | Chromobox protein homolog 3 (Heterochromatin protein 1 homolog gamma) (HP1 gamma) (M32) (Modifier 2 protein)                                                                                                        | 20.32635422                                         | 2            |

|      |        |         |                                                                                                                                                                                |             |   |
|------|--------|---------|--------------------------------------------------------------------------------------------------------------------------------------------------------------------------------|-------------|---|
| HPDP | O88844 | C73     | Isocitrate dehydrogenase [NADP] cytoplasmic (IDH)                                                                                                                              | 20.28660949 | 2 |
| HPDP | Q7TSI1 | C464    | Pleckstrin homology domain-containing family M member 1 (PH domain-containing family M member 1)                                                                               | 20.27430909 | 2 |
| HPDP | Q62419 | C277    | Endophilin-A2 (Endophilin-2) (SH3 domain protein 2B) (SH3 domain-containing GRB2-like protein 1)                                                                               | 20.1597845  | 2 |
| HPDP | Q9Z2W0 | C411    | Aspartyl aminopeptidase                                                                                                                                                        | 20.08429446 | 2 |
| HPDP | Q9JL8  | C425    | Serine--tRNA ligase, mitochondrial                                                                                                                                             | 20.04438709 | 2 |
| HPDP | P21981 | C553    | Protein-glutamine gamma-glutamyltransferase 2                                                                                                                                  | 19.98447735 | 2 |
| HPDP | Q91Y97 | C158    | Fructose-bisphosphate aldolase B                                                                                                                                               | 19.87182726 | 2 |
| HPDP | Q9DBN5 | C405    | Lon protease homolog 2, peroxisomal                                                                                                                                            | 19.84850213 | 2 |
| HPDP | Q8VC03 | C421    | Echinoderm microtubule-associated protein-like 3 (EMAP-3)                                                                                                                      | 19.83187399 | 2 |
| HPDP | P62242 | C100    | 40S ribosomal protein S8                                                                                                                                                       | 19.81349615 | 2 |
| HPDP | A2ASS6 | C29432  | Titin                                                                                                                                                                          | 19.79460004 | 2 |
| HPDP | Q63ZW7 | C1406   | InaD-like protein (Inadl protein) (Channel-interacting PDZ domain-containing protein) (Pals1-associated tight junction protein) (Protein associated to tight junction protein) | 19.70935729 | 2 |
| HPDP | Q9CPV4 | C45     | Glyoxalase domain-containing protein 4                                                                                                                                         | 19.70621887 | 2 |
| HPDP | Q68FD5 | C1266   | Clathrin heavy chain 1                                                                                                                                                         | 19.69269741 | 2 |
| HPDP | P54823 | C390    | Probable ATP-dependent RNA helicase DDX6                                                                                                                                       | 19.49673091 | 2 |
| HPDP | Q91YL2 | C32     | E3 ubiquitin-protein ligase RNF126                                                                                                                                             | 19.48361501 | 2 |
| HPDP | A6H8H2 | C1083   | DENN domain-containing protein 4C                                                                                                                                              | 19.41978765 | 3 |
| HPDP | Q01853 | C69,C77 | Transitional endoplasmic reticulum ATPase (TER ATPase)                                                                                                                         | 19.40789288 | 2 |
| HPDP | B7ZMP1 | C491    | Xaa-Pro aminopeptidase 3 (X-Pro aminopeptidase 3)                                                                                                                              | 19.29977564 | 2 |
| HPDP | A2ASS6 | C21780  | Titin                                                                                                                                                                          | 19.12293298 | 2 |
| HPDP | Q9ES28 | C427    | Rho guanine nucleotide exchange factor 7 (Beta-Pix) (PAK-interacting exchange factor beta) (p85SPR)                                                                            | 19.12161126 | 2 |
| HPDP | A2ARV4 | C2518   | Low-density lipoprotein receptor-related protein 2 (LRP-2) (Glycoprotein 330) (gp330) (Megalin)                                                                                | 19.03682762 | 2 |

|      |        |           |                                                                                                                                                                                                                                  |             |   |
|------|--------|-----------|----------------------------------------------------------------------------------------------------------------------------------------------------------------------------------------------------------------------------------|-------------|---|
| HPDP | Q6ZPJ3 | C365      | (E3-independent) E2 ubiquitin-conjugating enzyme UBE2O                                                                                                                                                                           | 18.97268389 | 3 |
| HPDP | Q61655 | C392      | ATP-dependent RNA helicase DDX19A                                                                                                                                                                                                | 18.88880189 | 2 |
| HPDP | P14824 | C669      | Annexin A6 (67 kDa calelectrin) (Annexin VI) (Annexin-6) (Calphobindin-II) (CPB-II) (Chromobindin-20) (Lipocortin VI) (Protein III) (p68)                                                                                        | 18.8218629  | 2 |
| HPDP | Q5HZI1 | C823      | Microtubule-associated tumor suppressor 1 homolog (AT2 receptor-binding protein) (Angiotensin-II type 2 receptor-interacting protein) (Coiled-coiled tumor suppressor gene 1 protein) (Mitochondrial tumor suppressor 1 homolog) | 18.76396509 | 2 |
| HPDP | P53996 | C141,C151 | Cellular nucleic acid-binding protein (CNBP) (Zinc finger protein 9)                                                                                                                                                             | 18.75122145 | 2 |
| HPDP | Q921G6 | C454      | Leucine-rich repeat and calponin homology domain-containing protein 4                                                                                                                                                            | 18.56565726 | 4 |
| HPDP | P82343 | C250      | N-acylglucosamine 2-epimerase (AGE)                                                                                                                                                                                              | 16.42343934 | 2 |
| HPDP | Q91W50 | C129      | Cold shock domain-containing protein E1                                                                                                                                                                                          | 16.0168855  | 2 |
| TMT  | Q7TNJ0 | C89       | Dendritic cell-specific transmembrane protein (DC-STAMP) (mDC-STAMP) (Dendrocyte-expressed seven transmembrane protein) (Transmembrane 7 superfamily member 4)                                                                   | 13.72900332 | 4 |
| TMT  | Q8R418 | C306      | Endoribonuclease Dicer                                                                                                                                                                                                           | 13.02362462 | 5 |
| TMT  | Q5FW85 | C8        | Extracellular matrix protein 2 (Tenonectin)                                                                                                                                                                                      | 13.00944639 | 4 |
| TMT  | Q8BV57 | C6        | Soluble scavenger receptor cysteine-rich domain-containing protein SSC5D (Scavenger receptor cysteine-rich domain-containing protein LOC284297)                                                                                  | 12.76398811 | 5 |
| TMT  | P70277 | C65       | Alpha-N-acetylgalactosaminide alpha-2,6-sialyltransferase 2                                                                                                                                                                      | 12.6184686  | 5 |
| TMT  | Q3UAW9 | C362      | Transcription factor IIIB 50 kDa subunit (B-related factor 2) (BRF-2)                                                                                                                                                            | 12.585631   | 5 |
| TMT  | Q8BLR9 | C236      | Hypoxia-inducible factor 1-alpha inhibitor                                                                                                                                                                                       | 12.5665622  | 5 |

|     |        |           |                                                                                                                                                                                        |             |   |
|-----|--------|-----------|----------------------------------------------------------------------------------------------------------------------------------------------------------------------------------------|-------------|---|
| TMT | Q9JMG4 | C8,C14    | Sodium/potassium-transporting ATPase subunit beta-1-interacting protein 4 (Na(+)/K(+)-transporting ATPase subunit beta-1-interacting protein 4) (Protein FAM77A)                       | 12.39302865 | 5 |
| TMT | A1Z198 | C330      | NACHT, LRR and PYD domains-containing protein 1b allele 2                                                                                                                              | 12.36513178 | 5 |
| TMT | Q9DB60 | C44,C47   | Prostamide/prostaglandin F synthase (Prostamide/PG F synthase) (Prostamide/PGF synthase)                                                                                               | 12.33380021 | 5 |
| TMT | P57110 | C677      | A disintegrin and metalloproteinase with thrombospondin motifs 8 (ADAM-TS 8) (ADAM-                                                                                                    | 12.30280006 | 5 |
| TMT | Q571F5 | C271      | SPRY domain-containing SOCS box protein 3 (SSB-                                                                                                                                        | 12.24478409 | 5 |
| TMT | O09118 | C17       | Netrin-1                                                                                                                                                                               | 12.21630324 | 5 |
| TMT | Q8C0W1 | C818      | Ankyrin repeat and MYND domain-containing protein                                                                                                                                      | 12.20108475 | 5 |
| TMT | Q9DBP5 | C20       | UMP-CMP kinase                                                                                                                                                                         | 12.14459788 | 5 |
| TMT | O35963 | C48       | Ras-related protein Rab-33B                                                                                                                                                            | 12.08737651 | 5 |
| TMT | A1L0T3 | C138      | Scavenger receptor cysteine-rich domain-containing group B protein (Four scavenger receptor cysteine-rich domains-containing protein) (S4D-SRCRB)                                      | 11.90176048 | 5 |
| TMT | Q8CGM1 | C1034     | Adhesion G protein-coupled receptor B2 (Brain-specific angiogenesis inhibitor 2)                                                                                                       | 11.8771311  | 5 |
| TMT | Q9WTN3 | C738,C753 | Sterol regulatory element-binding protein 1 (SREBP-1) (Sterol regulatory element-binding transcription factor 1) [Cleaved into: Processed sterol regulatory element-binding protein 1] | 11.804481   | 5 |
| TMT | Q8CJ70 | C5,C18    | Interleukin-19 (IL-19)                                                                                                                                                                 | 11.69925873 | 5 |
| TMT | Q6DFV8 | C217      | von Willebrand factor D and EGF domain-containing protein                                                                                                                              | 11.67417859 | 4 |

|      |        |           |                                                                                                                                                                                                                                      |             |   |
|------|--------|-----------|--------------------------------------------------------------------------------------------------------------------------------------------------------------------------------------------------------------------------------------|-------------|---|
| TMT  | Q8CGK5 | C81       | Interferon lambda receptor 1 (IFN-lambda R1) (Cytokine receptor class-II member 12) (Cytokine receptor family 2 member 12) (CRF2-12) (Interleukin-28 receptor subunit alpha) (IL-28 receptor subunit alpha) (IL-28R-alpha) (IL-28RA) | 11.61269071 | 5 |
| TMT  | Q4VAE3 | C31       | Transmembrane protein 65                                                                                                                                                                                                             | 11.41109714 | 5 |
| TMT  | Q9JLL3 | C25       | Tumor necrosis factor receptor superfamily member 19 (TRADE) (Toxicity and JNK inducer)                                                                                                                                              | 11.35771618 | 5 |
| TMT  | Q8K400 | C293      | Syntaxin-binding protein 5 (Lethal(2) giant larvae protein homolog 3) (Tomosyn-1)                                                                                                                                                    | 11.21114736 | 5 |
| TMT  | Q9DC22 | C200,C211 | DDB1- and CUL4-associated factor 6 (IQ motif and WD repeat-containing protein 1) (Nuclear receptor interaction protein) (NRIP)                                                                                                       | 11.00286202 | 5 |
| HPDP | Q9WUM3 | C25       | Coronin-1B (Coronin-2)                                                                                                                                                                                                               | 7.079871538 | 2 |
| HPDP | Q8K274 | C11       | Ketosamine-3-kinase                                                                                                                                                                                                                  | 5.271225169 | 2 |
| HPDP | P46471 | C389      | 26S proteasome regulatory subunit 7 (26S proteasome AAA-ATPase subunit RPT1) (Proteasome 26S subunit ATPase 2) (Protein MSS1)                                                                                                        | 5.062936789 | 2 |
| HPDP | P62754 | C12       | 40S ribosomal protein S6 (Phosphoprotein NP33)                                                                                                                                                                                       | 4.714241907 | 2 |
| HPDP | Q8R5H1 | C264      | Ubiquitin carboxyl-terminal hydrolase 15                                                                                                                                                                                             | 4.569012373 | 2 |
| HPDP | Q9JJ28 | C1069     | Protein flightless-1 homolog                                                                                                                                                                                                         | 4.407051634 | 2 |
| HPDP | Q60992 | C196,C197 | Guanine nucleotide exchange factor VAV2 (VAV-2)                                                                                                                                                                                      | 4.179681175 | 2 |
| HPDP | Q9D662 | C425      | Protein transport protein Sec23B (SEC23-related protein B)                                                                                                                                                                           | 3.985939588 | 2 |
| HPDP | O70439 | C28       | Syntaxin-7                                                                                                                                                                                                                           | 3.955148625 | 3 |
| HPDP | Q61768 | C632      | Kinesin-1 heavy chain (Conventional kinesin heavy chain) (Ubiquitous kinesin heavy chain) (UKHC)                                                                                                                                     | 3.760958689 | 2 |
| HPDP | Q99JY3 | C61       | GTPase IMAP family member 4 (Immunity-associated nucleotide 1 protein) (IAN-1) (Immunity-associated protein 4)                                                                                                                       | 3.614276688 | 2 |
| HPDP | P99029 | C200      | Peroxiredoxin-5, mitochondrial                                                                                                                                                                                                       | 3.604855607 | 3 |

|      |        |           |                                                                                                                                                               |             |   |
|------|--------|-----------|---------------------------------------------------------------------------------------------------------------------------------------------------------------|-------------|---|
| HPDP | Q8BZB2 | C7        | Phosphopantothenoylcysteine decarboxylase (PPC-                                                                                                               | 3.603461526 | 2 |
| TMT  | Q80VD1 | C52       | Protein FAM98B                                                                                                                                                | 3.259995258 | 5 |
| TMT  | Q80XD8 | C9        | Proline-rich acidic protein 1 (Pregnancy-specific uterine protein) (Uterine-specific proline-rich acidic                                                      | 3.172829061 | 5 |
| TMT  | Q9ESD6 | C54       | CKLF-like MARVEL transmembrane domain-containing protein 7 (Chemokine-like factor superfamily member 7) (LNV)                                                 | 2.984893682 | 5 |
| HPDP | Q9CYN2 | C26       | Signal peptidase complex subunit 2                                                                                                                            | 2.967611159 | 2 |
| HPDP | P14131 | C25       | 40S ribosomal protein S16                                                                                                                                     | 2.96535426  | 2 |
| TMT  | Q9JIP3 | C12       | Interleukin-17 receptor B (IL-17 receptor B) (IL-17RB) (IL-17 receptor homolog 1) (IL-17ER) (IL-17Rh1) (IL17Rh1) (Interleukin-17B receptor) (IL-17B receptor) | 2.927411041 | 5 |
| TMT  | Q8BKK5 | C263      | Zinc finger protein 689                                                                                                                                       | 2.920765805 | 5 |
| HPDP | Q99LG0 | C24       | Ubiquitin carboxyl-terminal hydrolase 16                                                                                                                      | 2.800809396 | 2 |
| HPDP | Q9Z1Z0 | C802      | General vesicular transport factor p115 (Protein USO1 homolog) (Transcytosis-associated protein) (TAP) (Vesicle-docking protein)                              | 2.748838009 | 2 |
| TMT  | O08738 | C259      | Caspase-6 (CASP-6)                                                                                                                                            | 2.742606331 | 5 |
| TMT  | O88282 | C381,C384 | B-cell CLL/lymphoma 6 member B protein (Bcl6-associated zinc finger protein)                                                                                  | 2.722924669 | 5 |
| TMT  | Q9Z0L3 | C371      | Otoconin-90 (Oc90) (Otoconin-95) (Oc95)                                                                                                                       | 2.71298463  | 5 |
| TMT  | E9PZZ1 | C653      | PR domain zinc finger protein 13                                                                                                                              | 2.547554782 | 4 |
| HPDP | Q8VHX6 | C2661     | Filamin-C (FLN-C) (ABP-280-like protein) (ABP-L) (Actin-binding-like protein) (Filamin-2) (Gamma-                                                             | 2.489804487 | 2 |
| TMT  | Q8BYA0 | C665      | Tubulin-specific chaperone D (Beta-tubulin cofactor D) (Tubulin-folding cofactor D)                                                                           | 2.48712789  | 5 |
| HPDP | P53996 | C120      | Cellular nucleic acid-binding protein (CNBP) (Zinc finger protein 9)                                                                                          | 2.455112234 | 2 |
| HPDP | Q8CGB6 | C548      | Tensin-2                                                                                                                                                      | 2.399443288 | 3 |
| HPDP | P15105 | C183      | Glutamine synthetase (GS)                                                                                                                                     | 2.388341937 | 2 |

|      |        |                |                                                                                                                                                                                                                                                                           |             |   |
|------|--------|----------------|---------------------------------------------------------------------------------------------------------------------------------------------------------------------------------------------------------------------------------------------------------------------------|-------------|---|
| HPDP | Q9CQ58 | C101           | Prolactin-8A9 (Placental prolactin-like protein C2) (PLP-C2) (PRL-like protein C2) (Prolactin-like protein C-beta) (PLP C-beta)                                                                                                                                           | 2.373532499 | 3 |
| TMT  | Q60676 | C221           | Serine/threonine-protein phosphatase 5 (PP5)                                                                                                                                                                                                                              | 2.35208233  | 5 |
| HPDP | Q80XN0 | C209           | D-beta-hydroxybutyrate dehydrogenase, mitochondrial                                                                                                                                                                                                                       | 2.33471439  | 3 |
| HPDP | Q93092 | C250           | Transaldolase                                                                                                                                                                                                                                                             | 2.325417107 | 2 |
| TMT  | Q5F2L2 | C13            | Alpha-(1,3)-fucosyltransferase 10                                                                                                                                                                                                                                         | 2.317276958 | 5 |
| TMT  | O09008 | C18            | Beta-1,3-N-acetylglucosaminyltransferase manic fringe                                                                                                                                                                                                                     | 2.305226515 | 4 |
| HPDP | P17742 | C67            | Peptidyl-prolyl cis-trans isomerase A (PPIase A)                                                                                                                                                                                                                          | 2.291684824 | 2 |
| HPDP | A2ASS6 | C21834         | Titin                                                                                                                                                                                                                                                                     | 2.248744617 | 2 |
| HPDP | O08573 | C258           | Galectin-9 (Gal-9)                                                                                                                                                                                                                                                        | 2.210136624 | 2 |
| HPDP | Q9D1Q6 | C92            | Endoplasmic reticulum resident protein 44 (ER protein 44) (ERp44) (Thioredoxin domain-containing                                                                                                                                                                          | 2.147055114 | 2 |
| HPDP | P53995 | C988           | Anaphase-promoting complex subunit 1 (APC1) (Cyclosome subunit 1) (Mitotic checkpoint regulator) (Testis-specific gene 24 protein)                                                                                                                                        | 2.039981245 | 2 |
| HPDP | P70441 | C201           | Na(+)/H(+) exchange regulatory cofactor NHE-RF1 (NHERF-1) (Ezrin-radixin-moesin-binding phosphoprotein 50) (EBP50) (Regulatory cofactor of Na(+)/H(+) exchanger) (Sodium-hydrogen exchanger regulatory factor 1) (Solute carrier family 9 isoform A3 regulatory factor 1) | 1.988263764 | 2 |
| TMT  | Q9QXW9 | C209           | Large neutral amino acids transporter small subunit 2 (L-type amino acid transporter 2) (mLAT2) (Solute carrier family 7 member 8)                                                                                                                                        | 1.963679629 | 5 |
| HPDP | P60766 | C157           | Cell division control protein 42 homolog (G25K GTP-binding protein)                                                                                                                                                                                                       | 1.950445964 | 2 |
| TMT  | Q66X22 | C891,C907,C908 | NACHT, LRR and PYD domains-containing protein 9B (NALP-delta)                                                                                                                                                                                                             | 1.935676951 | 4 |



|      |        |             |                                                                                                                                                                                                                                                                                                                                                                                                     |             |   |
|------|--------|-------------|-----------------------------------------------------------------------------------------------------------------------------------------------------------------------------------------------------------------------------------------------------------------------------------------------------------------------------------------------------------------------------------------------------|-------------|---|
| HPDP | P01027 | C559        | Complement C3 (HSE-MSF) [Cleaved into: Complement C3 beta chain; C3-beta-c (C3bc); Complement C3 alpha chain; C3a anaphylatoxin; Acylation stimulating protein (ASP) (C3adesArg); Complement C3b alpha' chain; Complement C3c alpha' chain fragment 1; Complement C3dg fragment; Complement C3g fragment; Complement C3d fragment; Complement C3f fragment; Complement C3c alpha' chain fragment 2] | 1.93095258  | 2 |
| HPDP | O88986 | C26         | 2-amino-3-ketobutyrate coenzyme A ligase, mitochondrial (AKB ligase)                                                                                                                                                                                                                                                                                                                                | 1.921218785 | 2 |
| HPDP | P35979 | C141        | 60S ribosomal protein L12                                                                                                                                                                                                                                                                                                                                                                           | 1.912774567 | 2 |
| HPDP | P63017 | C603        | Heat shock cognate 71 kDa protein (Heat shock 70 kDa protein 8)                                                                                                                                                                                                                                                                                                                                     | 1.900311126 | 2 |
| TMT  | Q8BLY7 | C180        | Hermansky-Pudlak syndrome 6 protein homolog (Ruby-eye protein) (Ru)                                                                                                                                                                                                                                                                                                                                 | 1.878707928 | 5 |
| HPDP | Q7TMW6 | C270        | Cytosolic iron-sulfur assembly component 3 (Cytosolic Fe-S cluster assembly factor NARFL) (Iron-only hydrogenase-like protein 1) (IOP1) (Nuclear prelamins A recognition factor-like protein)                                                                                                                                                                                                       | 1.847995032 | 2 |
| HPDP | Q60864 | C461        | Stress-induced-phosphoprotein 1 (STI1) (mSTI1) (Hsc70/Hsp90-organizing protein) (Hop)                                                                                                                                                                                                                                                                                                               | 1.832341765 | 2 |
| HPDP | A2ASS6 | C13473      | Titin                                                                                                                                                                                                                                                                                                                                                                                               | 1.794763146 | 2 |
| TMT  | Q8K4G1 | C1393,C1403 | Latent-transforming growth factor beta-binding protein 4 (LTBP-4)                                                                                                                                                                                                                                                                                                                                   | 1.71923574  | 5 |
| HPDP | O89053 | C24         | Coronin-1A (Coronin-like protein A) (Clipin-A) (Coronin-like protein p57) (Tryptophan aspartate-containing coat protein) (TACO)                                                                                                                                                                                                                                                                     | 1.710727777 | 2 |
| TMT  | Q7TPG7 | C107        | Protein FAM19A2 (Chemokine-like protein TAFA-2)                                                                                                                                                                                                                                                                                                                                                     | 1.706388912 | 5 |
| HPDP | Q9QUM9 | C167        | Proteasome subunit alpha type-6                                                                                                                                                                                                                                                                                                                                                                     | 1.696998107 | 2 |
| HPDP | Q80X90 | C1434       | Filamin-B (FLN-B) (ABP-280-like protein) (Actin-binding-like protein) (Beta-filamin)                                                                                                                                                                                                                                                                                                                | 1.668503957 | 2 |

|      |        |        |                                                                                                                                                                                                                                                                                                                                                                    |             |   |
|------|--------|--------|--------------------------------------------------------------------------------------------------------------------------------------------------------------------------------------------------------------------------------------------------------------------------------------------------------------------------------------------------------------------|-------------|---|
| HPDP | A2ASS6 | C33458 | Titin                                                                                                                                                                                                                                                                                                                                                              | 1.640392354 | 2 |
| HPDP | Q61553 | C481   | Fascin (Singed-like protein)                                                                                                                                                                                                                                                                                                                                       | 1.636609875 | 2 |
| HPDP | P61514 | C48    | 60S ribosomal protein L37a                                                                                                                                                                                                                                                                                                                                         | 1.593487828 | 2 |
| HPDP | P61161 | C221   | Actin-related protein 2 (Actin-like protein 2)                                                                                                                                                                                                                                                                                                                     | 1.554988721 | 2 |
| TMT  | P46097 | C91    | Synaptotagmin-2 (Inositol polyphosphate-binding protein) (IP4-binding protein) (IP4BP) (Synaptotagmin II) (SytII)                                                                                                                                                                                                                                                  | 1.554328226 | 5 |
| HPDP | Q8VDF3 | C347   | Death-associated protein kinase 2 (DAP kinase 2)                                                                                                                                                                                                                                                                                                                   | 1.52416734  | 2 |
| HPDP | Q78PY7 | C152   | Staphylococcal nuclease domain-containing protein 1                                                                                                                                                                                                                                                                                                                | 1.520546542 | 2 |
| HPDP | Q8BTM8 | C2582  | Filamin-A (FLN-A) (Actin-binding protein 280) (ABP-280) (Alpha-filamin) (Endothelial actin-binding protein) (Filamin-1) (Non-muscle filamin)                                                                                                                                                                                                                       | 1.416572906 | 2 |
| HPDP | Q64514 | C150   | Tripeptidyl-peptidase 2 (TPP-2)                                                                                                                                                                                                                                                                                                                                    | 1.399757173 | 2 |
| HPDP | Q09324 | C100   | Beta-1,3-galactosyl-O-glycosyl-glycoprotein beta-1,6-N-acetylglucosaminyltransferase                                                                                                                                                                                                                                                                               | 1.397345074 | 2 |
| HPDP | Q9CY97 | C12    | RNA polymerase II subunit A C-terminal domain phosphatase SSU72 (CTD phosphatase SSU72)                                                                                                                                                                                                                                                                            | 1.39424147  | 2 |
| HPDP | P39054 | C607   | Dynamin-2                                                                                                                                                                                                                                                                                                                                                          | 1.374247771 | 2 |
| HPDP | P68040 | C153   | Receptor of activated protein C kinase 1 (12-3) (Guanine nucleotide-binding protein subunit beta-2-like 1) (Receptor for activated C kinase) (Receptor of activated protein kinase C 1) (p205) [Cleaved into: Receptor of activated protein C kinase 1, N-terminally processed (Guanine nucleotide-binding protein subunit beta-2-like 1, N-terminally processed)] | 1.359971038 | 3 |
| HPDP | P26039 | C956   | Talin-1                                                                                                                                                                                                                                                                                                                                                            | 1.354647422 | 2 |
| HPDP | O70133 | C440   | ATP-dependent RNA helicase A                                                                                                                                                                                                                                                                                                                                       | 1.344512262 | 2 |
| HPDP | Q80X90 | C991   | Filamin-B (FLN-B) (ABP-280-like protein) (Actin-binding-like protein) (Beta-filamin)                                                                                                                                                                                                                                                                               | 1.337916373 | 2 |

|      |        |        |                                                                                                                                                                                            |             |   |
|------|--------|--------|--------------------------------------------------------------------------------------------------------------------------------------------------------------------------------------------|-------------|---|
| HPDP | Q99K30 | C546   | Epidermal growth factor receptor kinase substrate 8-like protein 2 (EPS8-like protein 2) (Epidermal growth factor receptor pathway substrate 8-related protein 2) (EPS8-related protein 2) | 1.332404247 | 2 |
| HPDP | P62908 | C134   | 40S ribosomal protein S3                                                                                                                                                                   | 1.319576402 | 2 |
| HPDP | E9Q394 | C609   | A-kinase anchor protein 13 (AKAP-13) (AKAP-Lbc)                                                                                                                                            | 1.277028431 | 3 |
| TMT  | P02798 | C33    | Metallothionein-2 (MT-2) (Metallothionein-II) (MT-                                                                                                                                         | 1.266697299 | 4 |
| HPDP | P62908 | C119   | 40S ribosomal protein S3                                                                                                                                                                   | 1.254357417 | 2 |
| HPDP | Q99LR1 | C40    | Monoacylglycerol lipase ABHD12                                                                                                                                                             | 1.23650774  | 2 |
| HPDP | P46471 | C377   | 26S proteasome regulatory subunit 7 (26S proteasome AAA-ATPase subunit RPT1) (Proteasome 26S subunit ATPase 2) (Protein MSS1)                                                              | 1.228249064 | 2 |
| HPDP | P28653 | C77    | Biglycan (Bone/cartilage proteoglycan I) (PG-S1)                                                                                                                                           | 1.222294589 | 2 |
| HPDP | O35075 | C243   | Down syndrome critical region protein 3 homolog (Down syndrome critical region protein A homolog)                                                                                          | 1.212332349 | 2 |
| HPDP | P61161 | C11    | Actin-related protein 2 (Actin-like protein 2)                                                                                                                                             | 1.199108066 | 2 |
| HPDP | P01837 | C106   | Immunoglobulin kappa constant (Ig kappa chain C region MOPC 21)                                                                                                                            | 1.19005698  | 2 |
| TMT  | Q61554 | C1099  | Fibrillin-1 [Cleaved into: Asprosin]                                                                                                                                                       | 1.179059728 | 3 |
| HPDP | Q80X90 | C1280  | Filamin-B (FLN-B) (ABP-280-like protein) (Actin-binding-like protein) (Beta-filamin)                                                                                                       | 1.169029965 | 2 |
| HPDP | D3YYU8 | C149   | Obscurin-like protein 1                                                                                                                                                                    | 1.102544141 | 2 |
| HPDP | P53996 | C159   | Cellular nucleic acid-binding protein (CNBP) (Zinc finger protein 9)                                                                                                                       | 1.087825704 | 2 |
| TMT  | P56546 | C18    | C-terminal-binding protein 2 (CtBP2)                                                                                                                                                       | 1.074827722 | 3 |
| HPDP | Q9JJ28 | C576   | Protein flightless-1 homolog                                                                                                                                                               | 1.067369682 | 2 |
| HPDP | Q80X90 | C604   | Filamin-B (FLN-B) (ABP-280-like protein) (Actin-binding-like protein) (Beta-filamin)                                                                                                       | 1.066918314 | 2 |
| TMT  | Q811Q4 | C430   | Disintegrin and metalloproteinase domain-containing protein 29 (ADAM 29)                                                                                                                   | 1.066068555 | 3 |
| HPDP | A2ASS6 | C20340 | Titin                                                                                                                                                                                      | 1.062863942 | 2 |

|      |        |       |                                                                                                                                                                                                                                                                                              |             |   |
|------|--------|-------|----------------------------------------------------------------------------------------------------------------------------------------------------------------------------------------------------------------------------------------------------------------------------------------------|-------------|---|
| HPDP | Q9DBF1 | C522  | Alpha-aminoadipic semialdehyde dehydrogenase (Alpha-AASA dehydrogenase)                                                                                                                                                                                                                      | 1.062682493 | 2 |
| HPDP | P52480 | C49   | Pyruvate kinase PKM                                                                                                                                                                                                                                                                          | 1.060038804 | 2 |
| HPDP | Q9D1A2 | C300  | Cytosolic non-specific dipeptidase                                                                                                                                                                                                                                                           | 1.044536941 | 2 |
| TMT  | Q6R5P0 | C743  | Toll-like receptor 11 (Toll-like receptor 12)                                                                                                                                                                                                                                                | 1.020796529 | 4 |
| HPDP | Q8K4I3 | C563  | Rho guanine nucleotide exchange factor 6 (Alpha-PIX) (Rac/Cdc42 guanine nucleotide exchange factor)                                                                                                                                                                                          | 1.015633881 | 2 |
| HPDP | P31230 | C159  | Aminoacyl tRNA synthase complex-interacting multifunctional protein 1 (Multisynthase complex auxiliary component p43) [Cleaved into: Endothelial monocyte-activating polypeptide 2 (EMAP-2) (Endothelial monocyte-activating polypeptide II) (EMAP-II) (Small inducible cytokine subfamily E | 0.995152319 | 2 |
| HPDP | Q8VD04 | C104  | GRIP1-associated protein 1 (GRASP-1) (HCMV-interacting protein) [Cleaved into: GRASP-1 C-terminal chain (30kDa C-terminus form)]                                                                                                                                                             | 0.963548687 | 3 |
| HPDP | Q8R146 | C309  | Acylamino-acid-releasing enzyme (AARE)                                                                                                                                                                                                                                                       | 0.921391689 | 2 |
| TMT  | P15920 | C315  | V-type proton ATPase 116 kDa subunit a isoform 2 (V-ATPase 116 kDa isoform a2) (Immune suppressor factor J6B7) (ISF) (Lysosomal H(+)-transporting ATPase V0 subunit a2) (ShIF) (Vacuolar proton translocating ATPase 116 kDa subunit a isoform 2)                                            | 0.912327311 | 2 |
| HPDP | P12399 | C103  | Protein CTLA-2-alpha (Cytotoxic T-lymphocyte-associated protein 2-alpha)                                                                                                                                                                                                                     | 0.908725648 | 2 |
| HPDP | P41105 | C13   | 60S ribosomal protein L28                                                                                                                                                                                                                                                                    | 0.866404857 | 2 |
| HPDP | Q8BGF6 | C98   | ELMO domain-containing protein 2                                                                                                                                                                                                                                                             | 0.863404858 | 2 |
| HPDP | Q9DCM0 | C34   | Persulfide dioxygenase ETHE1, mitochondrial                                                                                                                                                                                                                                                  | 0.859102687 | 2 |
| HPDP | O54988 | C1136 | STE20-like serine/threonine-protein kinase (STE20-like kinase) (mSLK)                                                                                                                                                                                                                        | 0.854916117 | 2 |
| HPDP | D3Z6Q9 | C425  | Bridging integrator 2                                                                                                                                                                                                                                                                        | 0.828034499 | 2 |

|      |        |           |                                                                                                                                                                              |             |   |
|------|--------|-----------|------------------------------------------------------------------------------------------------------------------------------------------------------------------------------|-------------|---|
| HPDP | P11983 | C357      | T-complex protein 1 subunit alpha (TCP-1-alpha) (CCT-alpha) (Tailless complex polypeptide 1A) (TCP-1-A) (Tailless complex polypeptide 1B) (TCP-1-B)                          | 0.815170441 | 2 |
| HPDP | P62874 | C25       | Guanine nucleotide-binding protein G(I)/G(S)/G(T) subunit beta-1 (Transducin beta chain 1)                                                                                   | 0.777801095 | 2 |
| HPDP | Q9JHW9 | C164      | Aldehyde dehydrogenase family 1 member A3                                                                                                                                    | 0.775764306 | 2 |
| HPDP | Q64213 | C279      | Splicing factor 1 (CW17) (Mammalian branch point-binding protein) (BBP) (mBBP) (Transcription factor ZFM1) (mZFM) (Zinc finger gene in MEN1 locus) (Zinc finger protein 162) | 0.727433087 | 2 |
| HPDP | Q80X90 | C450,C455 | Filamin-B (FLN-B) (ABP-280-like protein) (Actin-binding-like protein) (Beta-filamin)                                                                                         | 0.723299502 | 2 |
| HPDP | P21981 | C370      | Protein-glutamine gamma-glutamyltransferase 2                                                                                                                                | 0.702284056 | 2 |
| HPDP | P62983 | C144,C155 | Ubiquitin-40S ribosomal protein S27a (Ubiquitin carboxyl extension protein 80) [Cleaved into: Ubiquitin; 40S ribosomal protein S27a]                                         | 0.697668035 | 2 |
| HPDP | Q8VDP3 | C82       | [F-actin]-monooxygenase MICAL1                                                                                                                                               | 0.684887184 | 2 |
| HPDP | Q91W34 | C12       | RUS1 family protein C16orf58 homolog                                                                                                                                         | 0.643663222 | 2 |

**Table S2. List of proteins nitrosylated in GSNOR<sup>-/-</sup> placentas as compared to B6 placentas and B6- and GSNOR<sup>-/-</sup> placentas treated with ascorbate.** All SNOylated proteins were detected in at least 2 of 5 placentas/group. The number in the observation column is the number of placentas that showed expression of that particular SNOylated protein for that

| label | Uniprot Accession | SNO site | Protein name                                                                                                                                                     | Log2 fold change vs background GSNOR <sup>-/-</sup> | observations |
|-------|-------------------|----------|------------------------------------------------------------------------------------------------------------------------------------------------------------------|-----------------------------------------------------|--------------|
| TMT   | Q8R418            | C306     | Endoribonuclease Dicer                                                                                                                                           | 13.0236246                                          | 5            |
| TMT   | Q5FW85            | C8       | Extracellular matrix protein 2 (Tenonectin)                                                                                                                      | 13.0094464                                          | 4            |
| TMT   | Q8BV57            | C6       | Soluble scavenger receptor cysteine-rich domain-containing protein SSC5D (Scavenger receptor cysteine-rich domain-containing protein LOC284297 homolog)          | 12.7639881                                          | 5            |
| TMT   | P70277            | C65      | Alpha-N-acetylgalactosaminide alpha-2,6-sialyltransferase 2                                                                                                      | 12.6184686                                          | 5            |
| TMT   | Q9JMG4            | C8,C14   | Sodium/potassium-transporting ATPase subunit beta-1-interacting protein 4 (Na(+)/K(+)-transporting ATPase subunit beta-1-interacting protein 4) (Protein FAM77A) | 12.3930287                                          | 5            |
| TMT   | A1Z198            | C330     | NACHT, LRR and PYD domains-containing protein 1b allele 2                                                                                                        | 12.3651318                                          | 5            |
| TMT   | Q9DB60            | C44,C47  | Prostamide/prostaglandin F synthase (Prostamide/PGF synthase) (Prostamide/PGF synthase)                                                                          | 12.3338002                                          | 5            |
| TMT   | P57110            | C677     | A disintegrin and metalloproteinase with thrombospondin motifs 8 (ADAM-TS 8) (ADAM-TS8) (ADAMTS-8)                                                               | 12.3028001                                          | 5            |
| TMT   | Q571F5            | C271     | SPRY domain-containing SOCS box protein 3 (SSB-3)                                                                                                                | 12.2447841                                          | 5            |
| TMT   | O09118            | C17      | Netrin-1                                                                                                                                                         | 12.2163032                                          | 5            |
| TMT   | Q8C0W1            | C818     | Ankyrin repeat and MYND domain-containing protein 1                                                                                                              | 12.2010848                                          | 5            |
| TMT   | Q9DBP5            | C20      | UMP-CMP kinase                                                                                                                                                   | 12.1445979                                          | 5            |
| TMT   | O35963            | C48      | Ras-related protein Rab-33B                                                                                                                                      | 12.0873765                                          | 5            |
| TMT   | A1L0T3            | C138     | Scavenger receptor cysteine-rich domain-containing group B protein (Four scavenger receptor cysteine-rich domains-containing protein) (S4D-SRCRB)                | 11.9017605                                          | 5            |

|     |        |           |                                                                                                                                                                                                                                      |            |   |
|-----|--------|-----------|--------------------------------------------------------------------------------------------------------------------------------------------------------------------------------------------------------------------------------------|------------|---|
| TMT | Q8CGM1 | C1034     | Adhesion G protein-coupled receptor B2 (Brain-specific angiogenesis inhibitor 2)                                                                                                                                                     | 11.8771311 | 5 |
| TMT | Q9WTN3 | C738,C753 | Sterol regulatory element-binding protein 1 (SREBP-1) (Sterol regulatory element-binding transcription factor 1) [Cleaved into: Processed sterol regulatory element-binding protein 1]                                               | 11.804481  | 5 |
| TMT | Q8CJ70 | C5,C18    | Interleukin-19 (IL-19)                                                                                                                                                                                                               | 11.6992587 | 5 |
| TMT | Q6DFV8 | C217      | von Willebrand factor D and EGF domain-containing protein                                                                                                                                                                            | 11.6741786 | 4 |
| TMT | Q8CGK5 | C81       | Interferon lambda receptor 1 (IFN-lambda R1) (Cytokine receptor class-II member 12) (Cytokine receptor family 2 member 12) (CRF2-12) (Interleukin-28 receptor subunit alpha) (IL-28 receptor subunit alpha) (IL-28R-alpha) (IL-28RA) | 11.6126907 | 5 |
| TMT | Q4VAE3 | C31       | Transmembrane protein 65                                                                                                                                                                                                             | 11.4110971 | 5 |
| TMT | Q9JLL3 | C25       | Tumor necrosis factor receptor superfamily member 19 (TRADE) (Toxicity and JNK inducer)                                                                                                                                              | 11.3577162 | 5 |
| TMT | Q8K400 | C293      | Syntaxin-binding protein 5 (Lethal(2) giant larvae protein homolog 3) (Tomosyn-1)                                                                                                                                                    | 11.2111474 | 5 |
| TMT | Q9DC22 | C200,C211 | DDB1- and CUL4-associated factor 6 (IQ motif and WD repeat-containing protein 1) (Nuclear receptor interaction protein) (NRIP)                                                                                                       | 11.002862  | 5 |
| TMT | Q80VD1 | C52       | Protein FAM98B                                                                                                                                                                                                                       | 3.25999526 | 5 |
| TMT | Q80XD8 | C9        | Proline-rich acidic protein 1 (Pregnancy-specific uterine protein) (Uterine-specific proline-rich acidic protein)                                                                                                                    | 3.17282906 | 5 |
| TMT | Q9ESD6 | C54       | CKLF-like MARVEL transmembrane domain-containing protein 7 (Chemokine-like factor superfamily member 7) (LNV)                                                                                                                        | 2.98489368 | 5 |
| TMT | Q9JIP3 | C12       | Interleukin-17 receptor B (IL-17 receptor B) (IL-17RB) (IL-17 receptor homolog 1) (IL-17ER) (IL-17Rh1) (IL17Rh1) (Interleukin-17B receptor) (IL-17B receptor)                                                                        | 2.92741104 | 5 |
| TMT | Q8BKK5 | C263      | Zinc finger protein 689                                                                                                                                                                                                              | 2.9207658  | 5 |
| TMT | O08738 | C259      | Caspase-6 (CASP-6)                                                                                                                                                                                                                   | 2.74260633 | 5 |
| TMT | O88282 | C381,C384 | B-cell CLL/lymphoma 6 member B protein (Bcl6-associated zinc finger protein)                                                                                                                                                         | 2.72292467 | 5 |

|      |        |                |                                                                                                                          |            |   |
|------|--------|----------------|--------------------------------------------------------------------------------------------------------------------------|------------|---|
| TMT  | Q9Z0L3 | C371           | Otoconin-90 (Oc90) (Otoconin-95) (Oc95)                                                                                  | 2.71298463 | 5 |
| TMT  | E9PZZ1 | C653           | PR domain zinc finger protein 13                                                                                         | 2.54755478 | 4 |
| TMT  | Q8BYA0 | C665           | Tubulin-specific chaperone D (Beta-tubulin cofactor D) (Tubulin-folding cofactor D)                                      | 2.48712789 | 5 |
| TMT  | Q60676 | C221           | Serine/threonine-protein phosphatase 5 (PP5)                                                                             | 2.35208233 | 5 |
| TMT  | Q5F2L2 | C13            | Alpha-(1,3)-fucosyltransferase 10                                                                                        | 2.31727696 | 5 |
| TMT  | O09008 | C18            | Beta-1,3-N-acetylglucosaminyltransferase manic fringe                                                                    | 2.30522651 | 4 |
| HPDP | A2ASS6 | C21834         | Titin                                                                                                                    | 2.24874462 | 2 |
| TMT  | Q9QXW9 | C209           | Large neutral amino acids transporter small subunit 2 (L-type amino acid transporter 2) (mLAT2) (Solute carrier family 7 | 1.96367963 | 5 |
| TMT  | Q66X22 | C891,C907,C908 | NACHT, LRR and PYD domains-containing protein 9B (NALP-delta)                                                            | 1.93567695 | 4 |
| TMT  | Q8BLY7 | C180           | Hermansky-Pudlak syndrome 6 protein homolog (Ruby-eye protein) (Ru)                                                      | 1.87870793 | 5 |
| TMT  | Q8K4G1 | C1393,C1403    | Latent-transforming growth factor beta-binding protein 4 (LTBP-4)                                                        | 1.71923574 | 5 |
| TMT  | Q7TPG7 | C107           | Protein FAM19A2 (Chemokine-like protein TAFA-2)                                                                          | 1.70638891 | 5 |
| TMT  | P46097 | C91            | Synaptotagmin-2 (Inositol polyphosphate-binding protein) (IP4-binding protein) (IP4BP) (Synaptotagmin II) (SytII)        | 1.55432823 | 5 |
| TMT  | P02798 | C33            | Metallothionein-2 (MT-2) (Metallothionein-II) (MT-II)                                                                    | 1.2666973  | 4 |
| HPDP | P01837 | C106           | Immunoglobulin kappa constant (Ig kappa chain C region MOPC 21)                                                          | 1.19005698 | 2 |
| TMT  | Q61554 | C1099          | Fibrillin-1 [Cleaved into: Asprosin]                                                                                     | 1.17905973 | 3 |
| TMT  | P56546 | C18            | C-terminal-binding protein 2 (CtBP2)                                                                                     | 1.07482772 | 3 |
| TMT  | Q811Q4 | C430           | Disintegrin and metalloproteinase domain-containing protein 29 (ADAM 29)                                                 | 1.06606856 | 3 |
| TMT  | Q6R5P0 | C743           | Toll-like receptor 11 (Toll-like receptor 12)                                                                            | 1.02079653 | 4 |



|     |        |      |                                                                                                                                                                                                                                                   |            |   |
|-----|--------|------|---------------------------------------------------------------------------------------------------------------------------------------------------------------------------------------------------------------------------------------------------|------------|---|
| TMT | P15920 | C315 | V-type proton ATPase 116 kDa subunit a isoform 2 (V-ATPase 116 kDa isoform a2) (Immune suppressor factor J6B7) (ISF) (Lysosomal H(+)-transporting ATPase V0 subunit a2) (ShIF) (Vacuolar proton translocating ATPase 116 kDa subunit a isoform 2) | 0.91232731 | 2 |
|-----|--------|------|---------------------------------------------------------------------------------------------------------------------------------------------------------------------------------------------------------------------------------------------------|------------|---|

| Table S3. List of peptides identified using mass spectrometry analysis. |         |             |                                                    |                |
|-------------------------------------------------------------------------|---------|-------------|----------------------------------------------------|----------------|
| Gene                                                                    | Protein | SNO site    | Peptide Modified Sequence                          | original label |
| 1433G_MOUSE                                                             | P61982  | C112        | NC[+57]SETQYESK                                    | HPDP           |
| A16A1_MOUSE                                                             | Q571I9  | C249        | VAFC[+57]GAVEEGR                                   | HPDP           |
| AAK1_MOUSE                                                              | Q3UHQ0  | C319        | EC[+57]PVPNVQNSPIPAK                               | HPDP           |
| AATM_MOUSE                                                              | P05202  | C295        | VGAFTVVC[+329]K                                    | IodoTMT6       |
| ABD12_MOUSE                                                             | Q99LR1  | C40         | C[+125]AASGSSSSGSAAAALDADC[+57]SLK                 | HPDP           |
| ABI1_MOUSE                                                              | Q8CBW3  | C33         | VADYC[+57]ENNYIQATDK                               | HPDP           |
| ABLM1_MOUSE                                                             | Q8K4G5  | C146        | NGDYLC[+57]TLDYQR                                  | HPDP           |
| ACINU_MOUSE                                                             | Q9JIX8  | C513        | SSLPEC[+57]STQK                                    | HPDP           |
| ACOC_MOUSE                                                              | P28271  | C392        | DFESC[+57]LGAK                                     | HPDP           |
| ACTG_MOUSE                                                              | P63260  | C17         | EEEIAALVIDNGSGMC[+329]K                            | IodoTMT6       |
| ACTN1_MOUSE                                                             | Q7TPR4  | C480        | IC[+57]DQWDNLGALTQK                                | HPDP           |
| ACTN4_MOUSE                                                             | Q7TPR4  | C860        | ELPPDQAEYC[+329]IAR                                | IodoTMT6       |
| ADA29_MOUSE                                                             | Q811Q4  | C430        | EQC[+125]DC[+125]GSLRNC[+125]TNDLC[+329]CMSNCTLSTK | IodoTMT6       |
| AEDO_MOUSE                                                              | Q6PDY2  | C225        | EASGSAC[+57]DLPR                                   | HPDP           |
| AGK_MOUSE                                                               | Q9ESW4  | C72         | ATVFLNPAAC[+57]K                                   | HPDP           |
| AGM1_MOUSE                                                              | Q9CYR6  | C200        | AFVDLTNQVSC[+57]SGDVK                              | HPDP           |
| AGM1_MOUSE                                                              | Q9CYR6  | C348        | VPVYC[+57]TK                                       | HPDP           |
| AGRB2_MOUSE                                                             | Q8CGM1  | C1034       | FLC[+329]LGWGLPALVVAVSVGFTRTK                      | IodoTMT6       |
| AGRG4_MOUSE                                                             | B7ZCC9  | C2279,C2281 | GQGM[+16]DAIFHVPYSC[+329]AC[+329]WVIKAKSSLESVEL    | IodoTMT6       |
| AHDC1_MOUSE                                                             | Q6PAL7  | C788        | NC[+57]GFQGTEAR                                    | HPDP           |
| AIFM1_MOUSE                                                             | Q9Z0X1  | C440        | SNIWVAGDAAC[+57]FYDIK                              | HPDP           |
| AIMP1_MOUSE                                                             | P31230  | C159        | IGC[+57]IVTAK                                      | HPDP           |
| AIMP2_MOUSE                                                             | Q8R010  | C168        | C[+57]FGEQAR                                       | HPDP           |
| AKA10_MOUSE                                                             | O88845  | C110        | SC[+57]LDYQTQETK                                   | HPDP           |
| AKA12_MOUSE                                                             | Q9WTQ5  | C1113       | ATTC[+57]QVIK                                      | HPDP           |
| AKP13_MOUSE                                                             | E9Q394  | C1644       | QQGFNYC[+57]TSAISSPLTK                             | HPDP           |
| AKP13_MOUSE                                                             | E9Q394  | C417        | EGLPSC[+57]GNR                                     | HPDP           |
| AKP13_MOUSE                                                             | E9Q394  | C609        | VLGGQEPDTSIAGFC[+57]K                              | HPDP           |
| AL1A3_MOUSE                                                             | Q9JHW9  | C164        | TIPTDDNVVC[+57]FTR                                 | HPDP           |
| AL3A2_MOUSE                                                             | P47739  | C229        | DC[+125]DLDVAC[+329]R                              | IodoTMT6       |

|             |        |          |                                          |          |
|-------------|--------|----------|------------------------------------------|----------|
| AL7A1_MOUSE | Q9DBF1 | C522     | STC[+57]TINYSTSLPLAQGIK                  | HPDP     |
| ALBU_MOUSE  | P07724 | C289     | YMC[+57]ENQATISSK                        | HPDP     |
| ALBU_MOUSE  | P07724 | C294     | YM[+16]C[+57]ENQATISSK                   | HPDP     |
| ALBU_MOUSE  | P07724 | C416     | TNC[+57]DLYEK                            | HPDP     |
| ALBU_MOUSE  | P07724 | C58      | C[+57]SYDEHAK                            | HPDP     |
| ALBU_MOUSE  | P07724 | C591     | DTC[+57]FSTEGPNLVTR                      | HPDP     |
| ALBU_MOUSE  | P07724 | C77, C86 | TC[+57]VADESAANC[+57]DK                  | HPDP     |
| ALBU_MOUSE  | P07724 | C289     | YMC[+329]ENQATISSK                       | IodoTMT6 |
| ALBU_MOUSE  | P07724 | C591     | AADKDTC[+329]FSTEGPNLVTR                 | IodoTMT6 |
| ALBU_MOUSE  | P07724 | C77,C86  | TC[+329]VADESAANC[+329]DK                | IodoTMT6 |
| ALDH2_MOUSE | P47738 | C68      | TFPTVNPSTGEVIC[+57]QVAEGNK               | HPDP     |
| ALDOA_MOUSE | P05064 | C339     | ALANSLAC[+57]QGK                         | HPDP     |
| ALDOA_MOUSE | P05064 | C339     | RALANSLAC[+57]QGK                        | HPDP     |
| ALDOB_MOUSE | Q91Y97 | C158     | IADQC[+57]PSSLAIQENANALAR                | HPDP     |
| ALDOB_MOUSE | Q91Y97 | C269     | TVPAAVPGIC[+57]FLSGGMSEEDATLNLNAINR      | HPDP     |
| AMPL_MOUSE  | Q9CPY7 | C445     | QVIDC[+57]QLADVNNLGK                     | HPDP     |
| ANKL2_MOUSE | Q6P1H6 | C462     | TPEEVIC[+57]ER                           | HPDP     |
| ANMY1_MOUSE | Q8C0W1 | C818     | ALYLSKRAELAPC[+329]HR                    | IodoTMT6 |
| ANR17_MOUSE | Q99NH0 | C2059    | NSPLDC[+57]GSASPDK                       | HPDP     |
| ANX11_MOUSE | P97384 | C224     | GFGTDEQAIIDC[+57]LGSR                    | HPDP     |
| ANXA4_MOUSE | P97429 | C141     | SLEEDIC[+329]SDTSFMFQR                   | IodoTMT6 |
| ANXA6_MOUSE | P14824 | C669     | ALLALC[+57]GGED                          | HPDP     |
| AP1B1_MOUSE | O35643 | C863     | DC[+57]PLNTEAASNK                        | HPDP     |
| AP1G1_MOUSE | P22892 | C400     | ADC[+57]ASGIFLAAEK                       | HPDP     |
| AP2A2_MOUSE | P17427 | C902     | TTQIGC[+57]LLR                           | HPDP     |
| APC1_MOUSE  | P53995 | C988     | QAC[+57]EGNLPR                           | HPDP     |
| APEH_MOUSE  | Q8R146 | C309     | C[+125]ELLSDESLAVC[+57]SPR               | HPDP     |
| AQP1_MOUSE  | Q02013 | C189     | DLGGSAPLAIGLSVALGHLLAIDYTGCC[+329]GINPAR | IodoTMT6 |
| ARAF_MOUSE  | P04627 | C595     | TQADELPAC[+57]LLSAAR                     | HPDP     |
| ARFG1_MOUSE | Q9EPJ9 | C350     | SPSSDSWTC[+57]ADASTGR                    | HPDP     |
| ARHG6_MOUSE | Q8K4I3 | C25      | TVC[+57]DPEEFLK                          | HPDP     |
| ARHG6_MOUSE | Q8K4I3 | C563     | TSSSSC[+57]STHSSFSSTGQPR                 | HPDP     |

|             |        |           |                                      |          |
|-------------|--------|-----------|--------------------------------------|----------|
| ARHG7_MOUSE | Q9ES28 | C427      | NLSAQC[+57]QEVK                      | HPDP     |
| ARHG7_MOUSE | Q9ES28 | C700      | VIEAYC[+57]TSAK                      | HPDP     |
| ARHGC_MOUSE | Q8R4H2 | C1325     | TGTGDIATC[+57]DSPR                   | HPDP     |
| ARP2_MOUSE  | P61161 | C11       | VVVC[+57]DNGTGFK                     | HPDP     |
| ARP2_MOUSE  | P61161 | C11       | KVVVC[+57]DNGTGFK                    | HPDP     |
| ARP2_MOUSE  | P61161 | C221      | LC[+57]YVGYNIEQEQK                   | HPDP     |
| ARP3_MOUSE  | Q99JY9 | C408      | DYEEIGPSIC[+57]R                     | HPDP     |
| ARP3_MOUSE  | Q99JY9 | C408      | KDYEEIGPSIC[+57]R                    | HPDP     |
| ARP3_MOUSE  | Q99JY9 | C8, C12   | LPAC[+57]VVDC[+57]GTGYTK             | HPDP     |
| ARP3_MOUSE  | Q99JY9 | C408      | KDYEEIGPSIC[+329]R                   | IodoTMT6 |
| ARP3_MOUSE  | Q99JY9 | C408      | DYEEIGPSIC[+329]R                    | IodoTMT6 |
| ARRB1_MOUSE | Q8BWG8 | C150      | AFC[+57]AENLEEK                      | HPDP     |
| AS3MT_MOUSE | Q91WU5 | C33       | TSADLQTNAC[+329]VTR                  | IodoTMT6 |
| ASAH1_MOUSE | Q9WV54 | C291      | SGEGC[+57]VITR                       | HPDP     |
| AT131_MOUSE | Q9EPE9 | C333      | SPQENLVPC[+57]DVLLLR                 | HPDP     |
| AT1A1_MOUSE | Q8VDN2 | C211      | IISANGC[+57]K                        | HPDP     |
| AT2A2_MOUSE | O55143 | C377      | VEGDTC[+57]SLNEFSITGSTYAPIGEVQK      | HPDP     |
| AT2A2_MOUSE | O55143 | C669      | DAC[+57]LNAR                         | HPDP     |
| ATS8_MOUSE  | P57110 | C677      | GQC[+329]VKAGCDHVVNSPKK              | IodoTMT6 |
| BAG3_MOUSE  | Q9JLV1 | C185      | SQSPAASDC[+57]SSSSSSASLPSSGR         | HPDP     |
| BAG3_MOUSE  | Q9JLV1 | C154      | QC[+329]GQMPATATTAQAQPPTAHGPER       | IodoTMT6 |
| BCL6B_MOUSE | O88282 | C381,C384 | IHSGEKPYKC[+329]ETC[+329]GSRFVQVAHLR | IodoTMT6 |
| BDH_MOUSE   | Q80XN0 | C209      | SPYC[+57]ITK                         | HPDP     |
| BIN2_MOUSE  | D3Z6Q9 | C425      | ASGSGSC[+57]NAPGSPEGSSQLC[+125]SPR   | HPDP     |
| BOLA1_MOUSE | Q9D8S9 | C126      | ENPQLDISPPC[+57]LGGSK                | HPDP     |
| BRF2_MOUSE  | Q3UAW9 | C362      | RASPTPLPPC[+329]MLKPPKR              | IodoTMT6 |
| CA123_MOUSE | Q8BHG2 | C102      | TIVEFEC[+57]R                        | HPDP     |
| CACL1_MOUSE | Q8R0X2 | C370      | AGDELAYNPSAC[+57]ASSR                | HPDP     |
| CALR_MOUSE  | P14211 | C105      | HEQNIDC[+57]GGGYVK                   | HPDP     |
| CALR_MOUSE  | P14211 | C137      | DMHGDSEYNIMFGPDIC[+329]GPGTKK        | IodoTMT6 |
| CALR_MOUSE  | P14211 | C137      | DMHGDSEYNIMFGPDIC[+329]GPGTK         | IodoTMT6 |
| CAND2_MOUSE | Q6ZQ73 | C1138     | LATLC[+329]PAPVLQRVDRLEPLR           | IodoTMT6 |

|             |        |      |                                        |          |
|-------------|--------|------|----------------------------------------|----------|
| CAP1_MOUSE  | P40124 | C426 | NSLDC[+57]EIVSAK                       | HPDP     |
| CAPZB_MOUSE | P47757 | C62  | DYLLC[+57]DYNR                         | HPDP     |
| CARL1_MOUSE | Q6EDY6 | C712 | AC[+57]GGDAIQEDLK                      | HPDP     |
| CASP6_MOUSE | O08738 | C259 | QVPC[+329]FASM[+16]LTKKLHFCPKPSK       | IodoTMT6 |
| CATA_MOUSE  | P24270 | C232 | LVNADGEAVYC[+57]K                      | HPDP     |
| CATA_MOUSE  | P24270 | C425 | SALEHSVQC[+57]AVDVK                    | HPDP     |
| CATA_MOUSE  | P24270 | C393 | DGPMC[+329]MHDNQGGAPNYYPNSFSAPEQQR     | IodoTMT6 |
| CATB_MOUSE  | P10605 | C211 | SC[+57]EAGYSPSYK                       | HPDP     |
| CATB_MOUSE  | P10605 | C211 | SC[+329]EAGYSPSYKEDK                   | IodoTMT6 |
| CATB_MOUSE  | P10605 | C211 | SC[+329]EAGYSPSYK                      | IodoTMT6 |
| CATZ_MOUSE  | Q9WUU7 | C156 | HGIPDETC[+329]NNYQAK                   | IodoTMT6 |
| CBX3_MOUSE  | P23198 | C177 | LTWHSC[+57]PEDEAQ                      | HPDP     |
| CDC23_MOUSE | Q8BGZ4 | C532 | LWDEASTC[+57]AQK                       | HPDP     |
| CDC42_MOUSE | P60766 | C157 | YVEC[+57]SALTQK                        | HPDP     |
| CEAM5_MOUSE | Q3UKK2 | C909 | C[+57]QLSIDPVWR                        | HPDP     |
| CERU_MOUSE  | Q61147 | C239 | TFC[+57]SEPEK                          | HPDP     |
| CERU_MOUSE  | Q61147 | C694 | GTFDVEC[+57]LTTDHYTGGM[+16]K           | HPDP     |
| CERU_MOUSE  | Q61147 | C694 | GTFDVEC[+57]LTTDHYTGGMK                | HPDP     |
| CERU_MOUSE  | Q61147 | C713 | YTVNQC[+57]QR                          | HPDP     |
| CERU_MOUSE  | Q61147 | C173 | ADDKVLPGQQYVYVLHANEPSPGEGDSNC[+329]VTR | IodoTMT6 |
| CERU_MOUSE  | Q61147 | C173 | VLPGQQYVYVLHANEPSPGEGDSNC[+329]VTR     | IodoTMT6 |
| CERU_MOUSE  | Q61147 | C239 | TFC[+329]SEPEK                         | IodoTMT6 |
| CERU_MOUSE  | Q61147 | C239 | TFC[+329]SEPEKVDKDNEDFQESNR            | IodoTMT6 |
| CERU_MOUSE  | Q61147 | C694 | GTFDVEC[+329]LTTDHYTGGMK               | IodoTMT6 |
| CERU_MOUSE  | Q61147 | C713 | YTVNQC[+329]QR                         | IodoTMT6 |
| CH082_MOUSE | Q8VE95 | C132 | LSYC[+57]GGGEALAIPEPAR                 | HPDP     |
| CHPT1_MOUSE | Q8C025 | C386 | TSC[+57]QQAPEQVYK                      | HPDP     |
| CHRD1_MOUSE | Q9D1P4 | C211 | RKTSDFNTFLAQEGC[+329]TR                | IodoTMT6 |
| CHRD1_MOUSE | Q9D1P4 | C211 | KTSDFNFTFLAQEGC[+329]TR                | IodoTMT6 |
| CHRD1_MOUSE | Q9D1P4 | C211 | TSDFNFTFLAQEGC[+329]TR                 | IodoTMT6 |
| CK5P3_MOUSE | Q99LM2 | C136 | C[+57]QQLQQEYSR                        | HPDP     |
| CKAP4_MOUSE | Q8BMK4 | C79  | SSAATANASSASC[+57]SR                   | HPDP     |

|             |        |            |                             |          |
|-------------|--------|------------|-----------------------------|----------|
| CKAP4_MOUSE | Q8BMK4 | C79        | SSAATANASSASC[+329]SR       | IodoTMT6 |
| CKLF7_MOUSE | Q9ESD6 | C54        | VAQMVTLLIAFIC[+329]VR       | IodoTMT6 |
| CLCB_MOUSE  | Q6IRU5 | C199       | VAQLC[+57]DFNPK             | HPDP     |
| CLH1_MOUSE  | Q68FD5 | C1266      | EVC[+125]FAC[+57]VDGK       | HPDP     |
| CLH1_MOUSE  | Q68FD5 | C1102      | C[+329]NEPAVWSQLAK          | IodoTMT6 |
| CLIC1_MOUSE | Q9Z1Q5 | C223       | EEFASTC[+57]PDDEEIELAYEQVAR | HPDP     |
| CMTR1_MOUSE | Q9DBC3 | C503       | SNESYC[+57]SLQIK            | HPDP     |
| CMTR1_MOUSE | Q9DBC3 | C534       | EC[+57]LQLWK                | HPDP     |
| CNBP_MOUSE  | P53996 | C120       | C[+57]YSC[+125]GEFGHIQK     | HPDP     |
| CNBP_MOUSE  | P53996 | C141       | C[+57]GETGHVAINC[+125]SK    | HPDP     |
| CNBP_MOUSE  | P53996 | C141, C151 | C[+57]GETGHVAINC[+57]SK     | HPDP     |
| CNBP_MOUSE  | P53996 | C157       | C[+125]GETGHVAINC[+57]SK    | HPDP     |
| CNBP_MOUSE  | P53996 | C159       | TSEVNC[+57]YR               | HPDP     |
| CNBP_MOUSE  | P53996 | C162       | C[+57]GESGHLAR              | HPDP     |
| CNDP2_MOUSE | Q9D1A2 | C300       | DVGAETLLHSC[+57]K           | HPDP     |
| CNDP2_MOUSE | Q9D1A2 | C300       | DVGAETLLHSC[+57]KK          | HPDP     |
| CNN2_MOUSE  | Q08093 | C164       | AGQC[+57]VIGLQM[+16]GTNK    | HPDP     |
| CNN2_MOUSE  | Q08093 | C164       | AGQC[+57]VIGLQMGTNK         | HPDP     |
| CNN2_MOUSE  | Q08093 | C215       | C[+57]ASQVGM[+16]TAPGTR     | HPDP     |
| CO3_MOUSE   | P01027 | C559       | DSC[+57]IGTLVVK             | HPDP     |
| CO4A1_MOUSE | P02463 | C1460      | HSQTTDDPLC[+329]PPGTK       | IodoTMT6 |
| CO4A1_MOUSE | P02463 | C1493      | AHGQDLGTAGSC[+329]LR        | IodoTMT6 |
| CO4A2_MOUSE | P08122 | C1532      | AHNQDLGLAGSC[+329]LAR       | IodoTMT6 |
| COAC_MOUSE  | Q8BZB2 | C7         | APC[+57]PAAVPSEER           | HPDP     |
| COF1_MOUSE  | P18760 | C39        | AVLFC[+57]LSEDK             | HPDP     |
| COF1_MOUSE  | P18760 | C39        | AVLFC[+57]LSEDKK            | HPDP     |
| COPB2_MOUSE | O55029 | C56        | TFEVC[+57]DLPVR             | HPDP     |
| COPB2_MOUSE | O55029 | C351       | DMGSC[+329]EIYPQTIQHNPNGR   | IodoTMT6 |
| COR1A_MOUSE | O89053 | C24        | ADQC[+57]YEDVR              | HPDP     |
| COR1B_MOUSE | Q9WUM3 | C25        | NDQC[+57]YEDIR              | HPDP     |
| COR1C_MOUSE | Q9WUM4 | C190       | NGSLIC[+57]TASK             | HPDP     |
| COR1C_MOUSE | Q9WUM4 | C424       | KSELSC[+57]APK              | HPDP     |

|             |        |       |                                                   |          |
|-------------|--------|-------|---------------------------------------------------|----------|
| CPNE1_MOUSE | Q8C166 | C52   | NC[+57]SSPEFSK                                    | HPDP     |
| CPNS1_MOUSE | O88456 | C145  | TDGFGIDTC[+57]R                                   | HPDP     |
| CPSF1_MOUSE | Q9EPU4 | C1042 | VYAVATSTNTPC[+57]TR                               | HPDP     |
| CPSM_MOUSE  | Q8C196 | C225  | VVAVDC[+57]GIK                                    | HPDP     |
| CPZIP_MOUSE | Q3UZA1 | C244  | NTC[+57]NSTEKPEELVR                               | HPDP     |
| CRIP2_MOUSE | Q9DCT8 | C126  | ASSVTFTGEPNMC[+329]PR                             | IodoTMT6 |
| CSDE1_MOUSE | Q91W50 | C129  | SPAAPGQSPTGSVC[+57]YER                            | HPDP     |
| CSK22_MOUSE | O54833 | C336  | EQSQPC[+57]AENTVLSSGLTAAR                         | HPDP     |
| CSRP1_MOUSE | P97315 | C122  | C[+57]SQAVYAAEK                                   | HPDP     |
| CSRP1_MOUSE | P97315 | C167  | GLESTTLADKDGEIYC[+329]K                           | IodoTMT6 |
| CSRP1_MOUSE | P97315 | C167  | C[+125]GKGLESTTLADKDGEIYC[+329]K                  | IodoTMT6 |
| CSRP1_MOUSE | P97315 | C58   | KNLDSTTVAVHGEEIYC[+329]K                          | IodoTMT6 |
| CSRP1_MOUSE | P97315 | C58   | NLDSTTVAVHGEEIYC[+329]K                           | IodoTMT6 |
| CSRP2_MOUSE | P97314 | C167  | EGEIYC[+57]K                                      | HPDP     |
| CSRP2_MOUSE | P97314 | C167  | SLESTTLTEKEGEIYC[+57]K                            | HPDP     |
| CSRP2_MOUSE | P97314 | C167  | SLESTTLTEKEGEIYC[+329]K                           | IodoTMT6 |
| CSRP2_MOUSE | P97314 | C58   | NLDSTTVAIHDEEIYC[+329]K                           | IodoTMT6 |
| CTBP2_MOUSE | P56546 | C18   | LDRIC[+329]EGIRPQIM[+16]NGPLHPRPLVALLDGRDC[+125]T | IodoTMT6 |
| CTCF_MOUSE  | Q61164 | C472  | YC[+329]DAVFER                                    | IodoTMT6 |
| CTL2_MOUSE  | Q8BY89 | C401  | VVDDTAC[+57]PLLR                                  | HPDP     |
| CTL2A_MOUSE | P12399 | C103  | TNC[+57]YGNSLNR                                   | HPDP     |
| CTNA1_MOUSE | P26231 | C116  | SAAGEFADDPC[+57]SSVK                              | HPDP     |
| CTNA1_MOUSE | P26231 | C116  | SAAGEFADDPC[+329]SSVK                             | IodoTMT6 |
| CTNA1_MOUSE | P26231 | C116  | SAAGEFADDPC[+329]SSVKR                            | IodoTMT6 |
| CUBN_MOUSE  | Q9JLB4 | C1466 | IAQLC[+57]SR                                      | HPDP     |
| CUBN_MOUSE  | Q9JLB4 | C1510 | AVPGGC[+57]GGIFQVSR                               | HPDP     |
| CUBN_MOUSE  | Q9JLB4 | C1927 | LIGTYC[+57]GTQR                                   | HPDP     |
| CUBN_MOUSE  | Q9JLB4 | C2054 | LSQQLAVLC[+57]GR                                  | HPDP     |
| CUBN_MOUSE  | Q9JLB4 | C817  | ADYQVAC[+57]GGELR                                 | HPDP     |
| CUL4B_MOUSE | A2A432 | C74   | SVC[+57]PGTSGFSSPNPSAASAAAQEV                     | HPDP     |
| CXA1_MOUSE  | P23242 | C260  | SDPYHATTGPLSPSKDC[+329]GSPK                       | IodoTMT6 |
| CY24B_MOUSE | Q61093 | C126  | NLTFHKM[+16]VAWMIALHTAIHTIAHLFNVEWC[+329]VNAR     | IodoTMT6 |

|             |        |           |                                                   |          |
|-------------|--------|-----------|---------------------------------------------------|----------|
| CYFP1_MOUSE | Q7TMB8 | C428      | DC[+57]PDNAEEYER                                  | HPDP     |
| D19L4_MOUSE | A2AJQ3 | C355      | VFEFYLLC[+329]TLPVTLNLIVK                         | IodoTMT6 |
| DAPK2_MOUSE | Q8VDF3 | C347      | NC[+57]ESDTEENIAR                                 | HPDP     |
| DCAF6_MOUSE | Q9DC22 | C200,C211 | DDILINC[+125]RRAATSVAIC[+329]PPVPYYLAVGC[+329]SDS | IodoTMT6 |
| DCSTP_MOUSE | Q7TNJ0 | C89       | RARC[+57]FILLAVLSC[+329]GLR                       | IodoTMT6 |
| DD19A_MOUSE | Q61655 | C392      | VLVTTNVC[+57]AR                                   | HPDP     |
| DDX1_MOUSE  | Q91VR5 | C571      | FLIC[+57]TDVAAR                                   | HPDP     |
| DDX6_MOUSE  | P54823 | C390      | NLVC[+57]TDLFTR                                   | HPDP     |
| DEN4C_MOUSE | A6H8H2 | C1083     | ILTAALTC[+57]PK                                   | HPDP     |
| DESM_MOUSE  | P31001 | C332      | HQIQSYTC[+329]EIDALK                              | IodoTMT6 |
| DESM_MOUSE  | P31001 | C332      | HQIQSYTC[+329]EIDALKGTNDSLMR                      | IodoTMT6 |
| DHE3_MOUSE  | P26443 | C327      | C[+329]VGVGESDGSIWNPDGIDPK                        | IodoTMT6 |
| DHPR_MOUSE  | Q8BVI4 | C82       | VDAILC[+57]VAGGWAGGNAK                            | HPDP     |
| DHRS1_MOUSE | Q99L04 | C10       | GQVC[+57]VVTGASR                                  | HPDP     |
| DHSO_MOUSE  | Q64442 | C106      | EVDEYC[+57]K                                      | HPDP     |
| DHX36_MOUSE | Q8VHK9 | C277      | AESC[+57]GNGNSTGYQIR                              | HPDP     |
| DHX9_MOUSE  | O70133 | C440      | AAEC[+57]NIVVTQPR                                 | HPDP     |
| DI3L2_MOUSE | Q8CI75 | C376      | DC[+57]IFTIDPSTAR                                 | HPDP     |
| DIAC_MOUSE  | Q8R242 | C342      | GIGMWNANC[+329]LDYSDDALAR                         | IodoTMT6 |
| DIAP1_MOUSE | O08808 | C1210     | AGC[+57]AVTSLLELTK                                | HPDP     |
| DICER_MOUSE | Q8R418 | C306      | QILSDC[+329]RAVLVVLGPWC[+57]ADKVAGM[+16]M[+16]V   | IodoTMT6 |
| DLGP4_MOUSE | B1AZP2 | C726      | DTSDSQDANDSSC[+329]K                              | IodoTMT6 |
| DNJA2_MOUSE | Q9QYJ0 | C308      | VIEPGC[+57]VR                                     | HPDP     |
| DNJB6_MOUSE | O54946 | C243      | SLTINGVADENALAEEC[+329]QR                         | IodoTMT6 |
| DNPEP_MOUSE | Q9Z2W0 | C411      | NDSPC[+57]GTTIGPILASR                             | HPDP     |
| DOPD_MOUSE  | O35215 | C57       | STEPC[+329]AHLVSSIGVVGTAEQNR                      | IodoTMT6 |
| DP13A_MOUSE | Q8K3H0 | C615      | IC[+57]DSVGLAK                                    | HPDP     |
| DPM3_MOUSE  | Q9D1Q4 | C67       | VATFHDC[+57]EDAAR                                 | HPDP     |
| DPYL2_MOUSE | O08553 | C248      | SITIANQTNC[+57]PLYVTK                             | HPDP     |
| DPYL2_MOUSE | O08553 | C248      | SITIANQTNC[+329]PLYVTK                            | IodoTMT6 |
| DPYL2_MOUSE | O08553 | C248      | SITIANQTNC[+329]PLYVTKVMSK                        | IodoTMT6 |
| DPYL2_MOUSE | O08553 | C439      | THNSALEYNIFEGM[+16]EC[+329]R                      | IodoTMT6 |



|             |        |            |                                    |          |
|-------------|--------|------------|------------------------------------|----------|
| DPYL2_MOUSE | O08553 | C439       | THNSALEYNIFEGMEC[+329]R            | IodoTMT6 |
| DSCR3_MOUSE | O35075 | C243       | DATEIQNIQIADGDIC[+57]R             | HPDP     |
| DYHC1_MOUSE | Q9JHU4 | C631       | VQYPQSQAC[+57]K                    | HPDP     |
| DYN2_MOUSE  | P39054 | C607       | QIELAC[+57]DSQEDVDSWK              | HPDP     |
| ECM2_MOUSE  | Q5FW85 | C8         | LAVLFC[+329]FILLIVLQTDC[+125]ERGTR | IodoTMT6 |
| EDC3_MOUSE  | Q8K2D3 | C137       | SQDVAISPQQQQC[+57]SK               | HPDP     |
| EF1D_MOUSE  | P57776 | C217       | SSILLDVKPWDDTDMAQLETC[+329]VR      | IodoTMT6 |
| EF2_MOUSE   | P58252 | C369       | C[+57]JELLYEGPPDDEAAMGIK           | HPDP     |
| EF2_MOUSE   | P58252 | C591       | ETVSEESNVLC[+57]LSK                | HPDP     |
| EF2_MOUSE   | P58252 | C693       | EGALC[+57]EENMR                    | HPDP     |
| EF2_MOUSE   | P58252 | C693       | EGALC[+57]EENM[+16]R               | HPDP     |
| EF2_MOUSE   | P58252 | C591       | ETVSEESNVLC[+329]LSK               | IodoTMT6 |
| EF2_MOUSE   | P58252 | C728       | C[+329]LYASVLTAQPR                 | IodoTMT6 |
| EFTU_MOUSE  | Q8BFR5 | C290       | KGDEC[+57]ELLGHNK                  | HPDP     |
| EIF3A_MOUSE | P23116 | C478       | HC[+57]DLQVR                       | HPDP     |
| EIF3F_MOUSE | Q9DCH4 | C260       | TC[+57]FSPNR                       | HPDP     |
| ELMD2_MOUSE | Q8BGF6 | C98        | TC[+57]LLQITGYK                    | HPDP     |
| EMAL3_MOUSE | Q8VC03 | C421       | DSSC[+57]IVTSGK                    | HPDP     |
| ENOA_MOUSE  | P17182 | C337, C339 | SC[+57]NC[+57]LLLK                 | HPDP     |
| ENOA_MOUSE  | P17182 | C357       | VNQIGSVTESLQAC[+57]K               | HPDP     |
| EPN3_MOUSE  | Q91W69 | C461       | SPSTVELDPFGDSSPSC[+329]K           | IodoTMT6 |
| ERP44_MOUSE | Q9D1Q6 | C92        | VDC[+57]DQHSDIAQR                  | HPDP     |
| ES8L2_MOUSE | Q99K30 | C546       | SGQAGYVPC[+57]NILAEAR              | HPDP     |
| ESTD_MOUSE  | Q9R0P3 | C206       | AYDATC[+57]LVK                     | HPDP     |
| ETHE1_MOUSE | Q9DCM0 | C170       | TDFQQGC[+57]AK                     | HPDP     |
| ETHE1_MOUSE | Q9DCM0 | C34        | SC[+57]TYTYLLGDR                   | HPDP     |
| EVI5_MOUSE  | P97366 | C479       | LSEAESQC[+57]ALK                   | HPDP     |
| EXOC8_MOUSE | Q6PGF7 | C419       | AC[+57]ELFLR                       | HPDP     |
| F16P1_MOUSE | Q9QXD6 | C93        | SSYATC[+57]VLVSEENTNAIIIPEK        | HPDP     |
| F19A2_MOUSE | Q7TPG7 | C107       | WWCHMQPC[+57]LEGEEC[+329]KVLPR     | IodoTMT6 |
| F19A2_MOUSE | Q7TPG7 | C96        | WWC[+329]HMQPC[+57]LEGEECKVLPR     | IodoTMT6 |
| FA98B_MOUSE | Q80VD1 | C52        | AAEGGLSSPEFSELC[+329]IWLGSQIK      | IodoTMT6 |

|             |        |           |                                                 |          |
|-------------|--------|-----------|-------------------------------------------------|----------|
| FABP4_MOUSE | P04117 | C118      | LVVEC[+57]VMK                                   | HPDP     |
| FABP4_MOUSE | P04117 | C118      | LVVEC[+57]VM[+16]K                              | HPDP     |
| FABP4_MOUSE | P04117 | C118      | DGDKLVVEC[+57]VMK                               | HPDP     |
| FABP4_MOUSE | P04117 | C118      | DGDKLVVEC[+329]VMK                              | IodoTMT6 |
| FABP4_MOUSE | P04117 | C118      | LVVEC[+329]VMK                                  | IodoTMT6 |
| FABPL_MOUSE | P12710 | C69       | NEFTLGEEC[+57]ELETMTGEEK                        | HPDP     |
| FABPL_MOUSE | P12710 | C69       | NEFTLGEEC[+57]ELETM[+16]TGEK                    | HPDP     |
| FAK1_MOUSE  | P34152 | C597      | NVLVSSNDC[+57]VK                                | HPDP     |
| FARP1_MOUSE | F8VPU2 | C524      | QASPLISPLLNDQAC[+57]PR                          | HPDP     |
| FAS_MOUSE   | P19096 | C1181     | LLAAAC[+57]QLQLNGNLQLELGEALAQER                 | HPDP     |
| FAS_MOUSE   | P19096 | C223      | SFDDSGSGYC[+57]R                                | HPDP     |
| FBN1_MOUSE  | Q61554 | C1960     | C[+57]NEGYEVAPDGR                               | HPDP     |
| FBN1_MOUSE  | Q61554 | C1099     | GQCVNTPGDFEC[+57]KC[+329]DEGYESGFMM[+16]M[+16]K | IodoTMT6 |
| FBN1_MOUSE  | Q61554 | C1960     | C[+329]NEGYEVAPDGR                              | IodoTMT6 |
| FERM2_MOUSE | Q8CIB5 | C426      | GC[+57]EVTPDVNISGQK                             | HPDP     |
| FETA_MOUSE  | P02772 | C144      | TAPASVPPFQFPEPAESC[+329]K                       | IodoTMT6 |
| FETUA_MOUSE | P29699 | C336      | VGQPGAAGPVSPMC[+329]PGR                         | IodoTMT6 |
| FGF5_MOUSE  | P15656 | C200      | GC[+329]SPRVKPKQHVSTHFLPR                       | IodoTMT6 |
| FHL1_MOUSE  | P97447 | C255      | C[+57]SVNLANKR                                  | HPDP     |
| FHL2_MOUSE  | O70433 | C71       | C[+57]GSSLVDKPFPAK                              | HPDP     |
| FHL5_MOUSE  | Q9WTX7 | C222,C225 | KC[+329]AAC[+329]TKPITGLRGAK                    | IodoTMT6 |
| FHOD1_MOUSE | Q6P9Q4 | C539      | AEPIQEPPTC[+57]VPK                              | HPDP     |
| FINC_MOUSE  | P11276 | C136      | ISC[+57]TIANR                                   | HPDP     |
| FINC_MOUSE  | P11276 | C232      | C[+57]NDQDTR                                    | HPDP     |
| FKBP5_MOUSE | Q64378 | C215      | EEQC[+57]ILYLGPR                                | HPDP     |
| FLII_MOUSE  | Q9JJ28 | C1069     | TNGSALC[+57]TR                                  | HPDP     |
| FLII_MOUSE  | Q9JJ28 | C560      | AC[+57]SAIHAVNLR                                | HPDP     |
| FLII_MOUSE  | Q9JJ28 | C576      | NYLGAEC[+57]R                                   | HPDP     |
| FLNA_MOUSE  | Q8BTM8 | C1157     | AHVAPC[+57]FDASK                                | HPDP     |
| FLNA_MOUSE  | Q8BTM8 | C1453     | C[+57]SGPGLSPGMVR                               | HPDP     |
| FLNA_MOUSE  | Q8BTM8 | C2102     | VDINTEDLEDGTC[+57]R                             | HPDP     |
| FLNA_MOUSE  | Q8BTM8 | C2582     | SNFTVDC[+57]SK                                  | HPDP     |

|            |        |            |                                      |          |
|------------|--------|------------|--------------------------------------|----------|
| FLNA_MOUSE | Q8BTM8 | C2601      | TPC[+57]EEILVK                       | HPDP     |
| FLNA_MOUSE | Q8BTM8 | C8         | C[+57]GQSAAVASPGGSIDSR               | HPDP     |
| FLNA_MOUSE | Q8BTM8 | C1312      | VANPSGNLTDITYVQDC[+329]GDGTYK        | IodoTMT6 |
| FLNA_MOUSE | Q8BTM8 | C2102      | VDINTEDLEDGTC[+329]R                 | IodoTMT6 |
| FLNA_MOUSE | Q8BTM8 | C2102      | DAGYGGLSLSIEGPSKVDINTEDLEDGTC[+329]R | IodoTMT6 |
| FLNA_MOUSE | Q8BTM8 | C2293      | DGSC[+329]GVAYVVQEPGDYEVSVK          | IodoTMT6 |
| FLNA_MOUSE | Q8BTM8 | C2476      | MDC[+329]QEC[+125]PEGYR              | IodoTMT6 |
| FLNA_MOUSE | Q8BTM8 | C8         | C[+329]GQSAAVASPGGSIDSR              | IodoTMT6 |
| FLNB_MOUSE | Q80X90 | C1280      | AQITNPSGASTEC[+57]FVK                | HPDP     |
| FLNB_MOUSE | Q80X90 | C1326      | VAVTEGC[+57]QPSR                     | HPDP     |
| FLNB_MOUSE | Q80X90 | C1434      | IAGPGLSSC[+57]VR                     | HPDP     |
| FLNB_MOUSE | Q80X90 | C1868      | AEISC[+57]IDNK                       | HPDP     |
| FLNB_MOUSE | Q80X90 | C1876      | DGTC[+57]TVTYLPTLPGDYSILVK           | HPDP     |
| FLNB_MOUSE | Q80X90 | C2057      | VDIQTEDLEDGTC[+57]K                  | HPDP     |
| FLNB_MOUSE | Q80X90 | C2537      | SSFLVDC[+57]SK                       | HPDP     |
| FLNB_MOUSE | Q80X90 | C450, C455 | SPFGVQIGEAC[+57]NPNAC[+57]R          | HPDP     |
| FLNB_MOUSE | Q80X90 | C604       | IEYDDQNDGSC[+57]DVK                  | HPDP     |
| FLNB_MOUSE | Q80X90 | C660       | SGC[+57]TINNPAEFIVDPK                | HPDP     |
| FLNB_MOUSE | Q80X90 | C991       | VVPC[+57]LVAPVAGR                    | HPDP     |
| FLNB_MOUSE | Q80X90 | C991       | KVVPC[+57]LVAPVAGR                   | HPDP     |
| FLNB_MOUSE | Q80X90 | C2057      | VDIQTEDLEDGTC[+329]K                 | IodoTMT6 |
| FLNB_MOUSE | Q80X90 | C2057      | DAGYGGISLAVEGPSKVDIQTEDLEDGTC[+329]K | IodoTMT6 |
| FLNB_MOUSE | Q80X90 | C2248      | NGSC[+329]GVSYIAQEPGNYEVSIG          | IodoTMT6 |
| FLNB_MOUSE | Q80X90 | C2333      | VHSPSGAVEEC[+329]HVSELEPDKYAVR       | IodoTMT6 |
| FLNB_MOUSE | Q80X90 | C2431      | MDC[+329]QEIPEGYK                    | IodoTMT6 |
| FLNB_MOUSE | Q80X90 | C2537      | SSFLVDC[+329]SK                      | IodoTMT6 |
| FLNB_MOUSE | Q80X90 | C450       | SPFGVQIGEAC[+329]NPNAC[+125]R        | IodoTMT6 |
| FLNB_MOUSE | Q80X90 | C455       | SPFGVQIGEAC[+125]NPNAC[+329]R        | IodoTMT6 |
| FLNB_MOUSE | Q80X90 | C660       | SGC[+329]TINNPAEFIVDPK               | IodoTMT6 |
| FLNB_MOUSE | Q80X90 | C769       | ANEPHFTVDC[+329]TEAGEGDVSVGIK        | IodoTMT6 |
| FLNB_MOUSE | Q80X90 | C769       | SGLKANEPHFTVDC[+329]TEAGEGDVSVGIK    | IodoTMT6 |
| FLNB_MOUSE | Q8VHX6 | C1104      | GAGTGGLGLTVEGPC[+329]EAK             | IodoTMT6 |

|             |        |            |                                          |          |
|-------------|--------|------------|------------------------------------------|----------|
| FLNC_MOUSE  | Q8VHX6 | C2661      | NSFTVDC[+57]SK                           | HPDP     |
| FLNC_MOUSE  | Q8VHX6 | C2680      | TPC[+329]EEVYVK                          | IodoTMT6 |
| FN3C1_MOUSE | Q6DFV6 | C1112      | TKPLPPEPQLNC[+329]VVYGHQSLR              | IodoTMT6 |
| FRPD1_MOUSE | A2AKB4 | C1360      | AYSC[+57]TTPLSR                          | HPDP     |
| FSCN1_MOUSE | Q61553 | C481       | AC[+57]AETIDPASLWEY                      | HPDP     |
| FSCN1_MOUSE | Q61553 | C89        | EVPDGDC[+57]R                            | HPDP     |
| FUMH_MOUSE  | P97807 | C431       | LLGDASVSFTDNC[+57]VVGIQANTER             | HPDP     |
| FUT10_MOUSE | Q5F2L2 | C13        | LLASC[+329]LCVTATVFLM[+16]VTLQVVVELGKFER | IodoTMT6 |
| FXL20_MOUSE | Q9CZV8 | C283       | C[+57]SQLTDVGFTTLAR                      | HPDP     |
| FXR1_MOUSE  | Q61584 | C77        | ANDQEPC[+57]GWWLAK                       | HPDP     |
| FXR2_MOUSE  | Q9WVR4 | C282       | IYGETPEAC[+57]R                          | HPDP     |
| G3P_MOUSE   | P16858 | C150       | IVSNASC[+57]TTNC[+125]LAPLAK             | HPDP     |
| G3P_MOUSE   | P16858 | C150, C154 | IVSNASC[+57]TTNC[+57]LAPLAK              | HPDP     |
| G3P_MOUSE   | P16858 | C160       | IVSNASC[+125]TTNC[+57]LAPLAK             | HPDP     |
| GAB1_MOUSE  | Q9QYY0 | C406       | DASSQDC[+57]YDIPR                        | HPDP     |
| GALK1_MOUSE | Q9R0N0 | C243       | QC[+57]EEVAQALGK                         | HPDP     |
| GALT_MOUSE  | Q03249 | C75        | HDPLNPLC[+57]PGATR                       | HPDP     |
| GATM_MOUSE  | Q9D964 | C87        | AENAC[+57]VPPFTVEVK                      | HPDP     |
| GATM_MOUSE  | Q9D964 | C64        | DC[+329]PVSSYNEWDPLEEVIVGR               | IodoTMT6 |
| GATM_MOUSE  | Q9D964 | C87        | AENAC[+329]VPPFTVEVK                     | IodoTMT6 |
| GBB1_MOUSE  | P62874 | C25        | AC[+57]ADATLSQITNNIDPVGR                 | HPDP     |
| GBB1_MOUSE  | P62874 | C25        | KAC[+57]ADATLSQITNNIDPVGR                | HPDP     |
| GCNT1_MOUSE | Q09324 | C100       | DC[+57]ASFIR                             | HPDP     |
| GFPT1_MOUSE | P47856 | C262       | VDSTTC[+57]LFPVEEK                       | HPDP     |
| GFPT1_MOUSE | Q9Z2Z9 | C461       | ETDC[+329]GVHINAGPEIGVASTK               | IodoTMT6 |
| GIMA4_MOUSE | Q99JY3 | C61        | VFNSGIC[+57]AK                           | HPDP     |
| GLNA_MOUSE  | P15105 | C183       | AC[+57]LYAGVK                            | HPDP     |
| GLNA_MOUSE  | P15105 | C49        | TLDC[+57]EPK                             | HPDP     |
| GLOD4_MOUSE | Q9CPV4 | C45        | AAC[+57]NGPYDGG                          | HPDP     |
| GMPR1_MOUSE | Q9DCZ1 | C186       | VGVGPGSVC[+57]TTR                        | HPDP     |
| GON7_MOUSE  | P0C8B4 | C21        | VSC[+57]EASGDADPLQSLSAGVVR               | HPDP     |
| GORS2_MOUSE | Q99JX3 | C434       | VSDC[+57]TPAVEKPVSDADASEPS               | HPDP     |

|             |        |           |                                                    |          |
|-------------|--------|-----------|----------------------------------------------------|----------|
| GP126_MOUSE | Q6F3F9 | C38       | C[+125]C[+57]PWRLKPSALLFLFVLC[+57]VTCVPLSVC[+125]C | IodoTMT6 |
| GP142_MOUSE | Q7TQN9 | C233      | LLKWAHCLIVYFIPC[+329]NVFLVTNSAILR                  | IodoTMT6 |
| GPD1L_MOUSE | Q3ULJ0 | C216      | NIVAVGAGFC[+57]DGLR                                | HPDP     |
| GPX41_MOUSE | O70325 | C195      | YGPMEEPQVIEKDLPC[+329]YL                           | IodoTMT6 |
| GRAP1_MOUSE | Q8VD04 | C104      | LC[+57]SQLEQLELENR                                 | HPDP     |
| GRB10_MOUSE | Q60760 | C173      | NQC[+329]PTDTVNPVAR                                | IodoTMT6 |
| GRM1B_MOUSE | Q80TI0 | C20       | STPAC[+57]SPILR                                    | HPDP     |
| GRP75_MOUSE | P38647 | C66       | GAVVGIDLGTNSC[+57]VAVMEGK                          | HPDP     |
| GRP78_MOUSE | P20029 | C42       | KEDVGTVVGIDLGTTYSC[+57]VGVFK                       | HPDP     |
| GRP78_MOUSE | P20029 | C42       | EDVGTVVGIDLGTTYSC[+57]VGVFK                        | HPDP     |
| GSHR_MOUSE  | P47791 | C256      | NFDSLSSNC[+57]TEELENAGVEVLK                        | HPDP     |
| GSHR_MOUSE  | P47791 | C85       | AAVVESHKLGTC[+125]VNVGC[+329]VPK                   | IodoTMT6 |
| GSHR_MOUSE  | P47791 | C85       | LGGTC[+125]VNVGC[+329]VPK                          | IodoTMT6 |
| GSTK1_MOUSE | Q9DCM2 | C176      | LIENTDAAC[+57]K                                    | HPDP     |
| HA1K_MOUSE  | P14428 | C317      | GGDYALAPGSQTSDLSPDC[+329]K                         | IodoTMT6 |
| HDAC1_MOUSE | O09106 | C408      | ISIC[+57]SSDKR                                     | HPDP     |
| HEMO_MOUSE  | Q91X72 | C458      | SLPQPQKVNSILGC[+57]SQ                              | HPDP     |
| HEMO_MOUSE  | Q91X72 | C458      | VNSILGC[+57]SQ                                     | HPDP     |
| HEMO_MOUSE  | Q91X72 | C364      | ELGSPPGISLETIDAAFSC[+329]PGSSR                     | IodoTMT6 |
| HEMO_MOUSE  | Q91X72 | C458      | SLPQPQKVNSILGC[+329]SQ                             | IodoTMT6 |
| HEMO_MOUSE  | Q91X72 | C458      | VNSILGC[+329]SQ                                    | IodoTMT6 |
| HIF1N_MOUSE | Q8BLR9 | C236      | RC[+125]ILFPPDQFEC[+57]LYPYPVHHPC[+329]DR          | IodoTMT6 |
| HIF1N_MOUSE | Q8BLR9 | C236      | RC[+125]ILFPPDQFEC[+57]LYPYPVHHPC[+329]DR          | IodoTMT6 |
| HMCS2_MOUSE | P54869 | C96, C106 | MGFC[+57]SVQEDINSLC[+57]LTVVQR                     | HPDP     |
| HNRL1_MOUSE | Q8VDM6 | C533      | KAIVIC[+329]PTDEDLKDR                              | IodoTMT6 |
| HNRL1_MOUSE | Q8VDM6 | C533      | AIVIC[+329]PTDEDLKDR                               | IodoTMT6 |
| HNRPD_MOUSE | Q60668 | C126      | FGEVVDC[+57]TLK                                    | HPDP     |
| HNRPL_MOUSE | Q8R081 | C578      | LC[+57]FSTAQHAS                                    | HPDP     |
| HNRPQ_MOUSE | Q7TMK9 | C289      | GFC[+57]FLEYEDHK                                   | HPDP     |
| HNRPU_MOUSE | Q8VEK3 | C583      | KAVVVC[+57]PK                                      | HPDP     |
| HNRPU_MOUSE | Q8VEK3 | C583      | AVVVC[+57]PKDEDYK                                  | HPDP     |
| HPRT_MOUSE  | P00493 | C106      | SYC[+57]NDQSTGDIK                                  | HPDP     |

|             |        |        |                                             |          |
|-------------|--------|--------|---------------------------------------------|----------|
| HPRT_MOUSE  | P00493 | C206   | DLNHVC[+57]VISETGK                          | HPDP     |
| HPS6_MOUSE  | Q8BLY7 | C180   | TLETSGEAGTKLGC[+329]THILLHHCPLFGLIASR       | IodoTMT6 |
| HPS6_MOUSE  | Q8BLY7 | C692   | LLLAFAQHRRLDAHLPLLC[+329]R                  | IodoTMT6 |
| HSP72_MOUSE | P17156 | C606   | VC[+57]NPIISK                               | HPDP     |
| HSP74_MOUSE | Q61316 | C167   | SVMDATQIAGLNC[+329]LR                       | IodoTMT6 |
| HSP7C_MOUSE | P63017 | C17    | GPAVGIDLGTTYSC[+57]VGVFQHGK                 | HPDP     |
| HSP7C_MOUSE | P63017 | C603   | VC[+57]NPIITK                               | HPDP     |
| HXK2_MOUSE  | O08528 | C375   | IC[+57]QIVSTR                               | HPDP     |
| I17RB_MOUSE | Q9JIP3 | C12    | MLLVLLILAASC[+329]RSALPR                    | IodoTMT6 |
| ICAL_MOUSE  | P51125 | C408   | C[+329]GEDEDTVPAEYR                         | IodoTMT6 |
| IDHC_MOUSE  | O88844 | C73    | C[+57]ATITPDEK                              | HPDP     |
| IF2G_MOUSE  | Q9Z0N1 | C105   | SC[+57]GSSTPDEFPTDIPGTK                     | HPDP     |
| IF2G_MOUSE  | Q9Z0N1 | C105   | SC[+329]GSSTPDEFPTDIPGTK                    | IodoTMT6 |
| IF4B_MOUSE  | Q8BGD9 | C543   | VDVVGATQGQAGSC[+57]SR                       | HPDP     |
| IF4B_MOUSE  | Q8BGD9 | C543   | DGNKVDVVGATQGQAGSC[+57]SR                   | HPDP     |
| IF5_MOUSE   | P59325 | C122   | KQTIGNSC[+329]K                             | IodoTMT6 |
| IGHM_MOUSE  | P01872 | C453   | STGKPTLYNVSLIM[+16]SDTGGTC[+329]Y           | IodoTMT6 |
| IGHM_MOUSE  | P01872 | C453   | STGKPTLYNVSLIMSDTGGTC[+329]Y                | IodoTMT6 |
| IGHM_MOUSE  | P01872 | C88    | SILEGSDEYLC[+329]K                          | IodoTMT6 |
| IGKC_MOUSE  | P01837 | C106   | SFNRNEC[+57]                                | HPDP     |
| IGKC_MOUSE  | P01837 | C86    | HNSYTC[+57]EATHK                            | HPDP     |
| IL19_MOUSE  | Q8CJ70 | C5,C18 | KTQC[+329]ASTWLLGM[+16]TLILC[+329]SVHIYSLRR | IodoTMT6 |
| INADL_MOUSE | Q63ZW7 | C1406  | ESESPDSAAC[+57]QIK                          | HPDP     |
| INLR1_MOUSE | Q8CGK5 | C81    | TGWRPVEHCAGIKALVC[+329]PLMCLKK              | IodoTMT6 |
| INSM1_MOUSE | Q63ZV0 | C482   | GAQERHLRLLHAAQVFPC[+329]K                   | IodoTMT6 |
| IRGQ_MOUSE  | Q8VIM9 | C370   | AGIGDSGC[+57]TAAR                           | HPDP     |
| KBL_MOUSE   | O88986 | C26    | C[+57]ILDSELEGIR                            | HPDP     |
| KBTBD_MOUSE | Q8C828 | C337   | GRLFVCLWRPADITAVVEYVVQMDKWLPVAELC[+329]R    | IodoTMT6 |
| KCY_MOUSE   | Q9DBP5 | C20    | KPLVVFVLGGPGAGKGTQC[+329]AR                 | IodoTMT6 |
| KINH_MOUSE  | Q61768 | C632   | ELAAC[+57]QLR                               | HPDP     |
| KNG1_MOUSE  | O08677 | C339   | ESNTELAEDC[+57]EIK                          | HPDP     |
| KNG1_MOUSE  | O08677 | C125   | ENEFFIVTQTC[+329]K                          | IodoTMT6 |

|             |        |            |                                             |          |
|-------------|--------|------------|---------------------------------------------|----------|
| KNG1_MOUSE  | O08677 | C369       | C[+329]QALDMTEMAR                           | IodoTMT6 |
| KPCI_MOUSE  | Q62074 | C190       | LVTIEC[+57]GR                               | HPDP     |
| KPYM_MOUSE  | P52480 | C423, C424 | C[+57]C[+57]SGAIIVLTK                       | HPDP     |
| KPYM_MOUSE  | P52480 | C49        | NTGIIC[+57]TIGPASR                          | HPDP     |
| KPYM_MOUSE  | P52480 | C423       | C[+329]C[+125]SGAIIVLTK                     | IodoTMT6 |
| KPYM_MOUSE  | P52480 | C423       | C[+329]C[+125]SGAIIVLTKSGR                  | IodoTMT6 |
| KPYM_MOUSE  | P52480 | C424       | C[+125]C[+329]SGAIIVLTK                     | IodoTMT6 |
| KPYM_MOUSE  | P52480 | C49        | NTGIIC[+329]TIGPASR                         | IodoTMT6 |
| KPYR_MOUSE  | P53657 | C360,C369  | VFLAQKMMIGRC[+329]NLAGKPVVC[+329]ATQMLESMTK | IodoTMT6 |
| KT3K_MOUSE  | Q8K274 | C11        | ELGC[+57]SSVK                               | HPDP     |
| LAC3_MOUSE  | P01844 | C103       | SLSPAEC[+329]L                              | IodoTMT6 |
| LAMA5_MOUSE | Q61001 | C69        | ITASATC[+57]GEEAPTR                         | HPDP     |
| LAMA5_MOUSE | Q61001 | C69        | ITASATC[+329]GEEAPTR                        | IodoTMT6 |
| LAMB1_MOUSE | P02469 | C643       | C[+329]GNTVPDDDNQVVSLSPGSR                  | IodoTMT6 |
| LAMC1_MOUSE | P02468 | C349       | SQEC[+329]YFDPELYR                          | IodoTMT6 |
| LAS1L_MOUSE | A2BE28 | C488       | VC[+57]SIYTQNGENGLAK                        | HPDP     |
| LAT2_MOUSE  | Q9QXW9 | C209       | LLALALIIM[+16]GIVQIC[+329]K                 | IodoTMT6 |
| LAT4_MOUSE  | Q8CGA3 | C295       | LC[+57]LSTVDLEVK                            | HPDP     |
| LCAP_MOUSE  | Q8C129 | C305       | SAFPC[+57]FDEPAFK                           | HPDP     |
| LDHA_MOUSE  | P06151 | C35        | ITVVGVGAVGMAC[+57]AISILMK                   | HPDP     |
| LDHB_MOUSE  | P16125 | C36        | ITVVGVGQVGMAC[+57]AISILGK                   | HPDP     |
| LEG2_MOUSE  | Q9CQW5 | C57        | FDESTIVC[+57]NTSEGGR                        | HPDP     |
| LEG9_MOUSE  | O08573 | C258       | C[+57]GGDIAFHLNPR                           | HPDP     |
| LIPB2_MOUSE | O35711 | C398       | C[+57]VDGNQLSPVGEPK                         | HPDP     |
| LKHA4_MOUSE | P24527 | C147       | AILPC[+57]QDTPSVK                           | HPDP     |
| LKHA4_MOUSE | P24527 | C147       | AILPC[+329]QDTPSVK                          | IodoTMT6 |
| LKHA4_MOUSE | P24527 | C17        | PEVADTC[+125]SLASPASVC[+329]R               | IodoTMT6 |
| LMCD1_MOUSE | Q8VEE1 | C246       | EVEYVC[+125]ELC[+329]K                      | IodoTMT6 |
| LMNA_MOUSE  | P48678 | C522       | AQNTWGC[+57]GSSLR                           | HPDP     |
| LMNA_MOUSE  | P48678 | C590, C593 | TVLC[+57]GTC[+57]GQPADK                     | HPDP     |
| LMNB2_MOUSE | P21619 | C190       | C[+57]QSLQEELAFSK                           | HPDP     |
| LONP2_MOUSE | Q9DBN5 | C405       | IALGGVC[+57]DQSDIR                          | HPDP     |

|             |        |             |                                                |          |
|-------------|--------|-------------|------------------------------------------------|----------|
| LR16A_MOUSE | Q6EDY6 | C1360       | C[+329]SDSGEEAEKEFIFV                          | IodoTMT6 |
| LRC47_MOUSE | Q505F5 | C544        | DGQC[+57]PLVVEQVR                              | HPDP     |
| LRC59_MOUSE | Q922Q8 | C131        | VAGDC[+57]LDEK                                 | HPDP     |
| LRCH4_MOUSE | Q921G6 | C454        | AAGAGASAPSTQATC[+57]NGPPK                      | HPDP     |
| LRP1B_MOUSE | Q9JI18 | C1540       | GPC[+329]SHLCLINHNRSAACAC[+125]PHLM[+16]KLSSDK | IodoTMT6 |
| LRP2_MOUSE  | A2ARV4 | C2518       | AIVLDPC[+57]R                                  | HPDP     |
| LRP2_MOUSE  | A2ARV4 | C2713       | C[+57]ISQDWK                                   | HPDP     |
| LRP2_MOUSE  | A2ARV4 | C2830       | C[+329]QTTNIC[+57]VPR                          | IodoTMT6 |
| LSM7_MOUSE  | Q9CQQ8 | C76         | QLGLVVC[+329]R                                 | IodoTMT6 |
| LSM7_MOUSE  | Q9CQQ8 | C76         | LTEDTRQLGLVVC[+329]R                           | IodoTMT6 |
| LTBP4_MOUSE | Q8K4G1 | C1393,C1403 | RC[+125]VSNESQSLDDNLGVC[+329]WQEVGPDLC[+329]SR | IodoTMT6 |
| LY6C2_MOUSE | P0CW02 | C53         | ASDGFC[+329]IAQNIELIEDSQR                      | IodoTMT6 |
| MA7D1_MOUSE | A2AJI0 | C363        | THPSAAVPVC[+57]PR                              | HPDP     |
| MAGI3_MOUSE | Q9EQJ9 | C1439       | AGC[+57]TPQSSSLVK                              | HPDP     |
| MAOX_MOUSE  | P06801 | C415        | AEC[+57]SAEQC[+125]YK                          | HPDP     |
| MAOX_MOUSE  | P06801 | C415, C420  | AEC[+57]SAEQC[+57]YK                           | HPDP     |
| MAOX_MOUSE  | P06801 | C415        | AEC[+329]SAEQC[+125]YK                         | IodoTMT6 |
| MAP1B_MOUSE | P14873 | C1913       | SPC[+329]DSGYSYETIEK                           | IodoTMT6 |
| MAP2_MOUSE  | O08663 | C121        | VQTDPPSPIC[+57]DLYPNGVFPK                      | HPDP     |
| MAP4_MOUSE  | P27546 | C636        | ETPGSQPSEPC[+57]SGVSR                          | HPDP     |
| MAP4_MOUSE  | P27546 | C636        | ETPGSQPSEPC[+329]SGVSR                         | IodoTMT6 |
| MARC2_MOUSE | Q922Q1 | C301        | LC[+57]DPSVK                                   | HPDP     |
| MCEE_MOUSE  | Q9D1I5 | C168        | DC[+57]GGVLVELEQA                              | HPDP     |
| MD1L1_MOUSE | Q9WTX8 | C233        | LC[+57]LQEQDAAVVK                              | HPDP     |
| MDHC_MOUSE  | P14152 | C137        | KSVKVIVVGNPANTNC[+329]LTASK                    | IodoTMT6 |
| MDHC_MOUSE  | P14152 | C137        | SVKVIVVGNPANTNC[+329]LTASK                     | IodoTMT6 |
| MDHC_MOUSE  | P14152 | C137        | VIVVGNPANTNC[+329]LTASK                        | IodoTMT6 |
| MDHC_MOUSE  | P14152 | C154        | SAPSIPKENFSC[+329]LTR                          | IodoTMT6 |
| MDR1A_MOUSE | P21447 | C638        | LVMTQTAGNEIELGNEAC[+329]K                      | IodoTMT6 |
| MET7B_MOUSE | Q9DD20 | C96         | VTC[+57]VDPNPNFEK                              | HPDP     |
| MFAP3_MOUSE | Q922T2 | C241        | SVPLPLLILNC[+329]RAFVEEMFEAVR                  | IodoTMT6 |
| MFN1_MOUSE  | Q811U4 | C681        | LC[+57]QQVDVTQK                                | HPDP     |



|             |        |               |                                            |          |
|-------------|--------|---------------|--------------------------------------------|----------|
| MFNG_MOUSE  | O09008 | C18           | HC[+57]RLFRGM[+16]AGALFTLLC[+329]VGLLSLR   | IodoTMT6 |
| MICA1_MOUSE | Q8VDP3 | C82           | ASQPVYQQGQAC[+57]TNTK                      | HPDP     |
| MPRI_MOUSE  | Q07113 | C1910         | SYDEC[+329]VLEGR                           | IodoTMT6 |
| MPRI_MOUSE  | P97434 | C723          | EGYVLQATC[+57]ER                           | HPDP     |
| MT1_MOUSE   | P02802 | C44           | C[+329]AQGC[+125]VC[+125]K                 | IodoTMT6 |
| MT1_MOUSE   | P02802 | C44           | C[+329]AQGC[+57]VC[+57]K                   | IodoTMT6 |
| MT1_MOUSE   | P02802 | C50           | C[+125]AQGC[+125]VC[+329]K                 | IodoTMT6 |
| MT1_MOUSE   | P02802 | C50           | C[+125]AQGC[+57]VC[+329]K                  | IodoTMT6 |
| MT2_MOUSE   | P02798 | C44, C48, C50 | C[+57]SQGC[+57]IC[+57]K                    | HPDP     |
| MT2_MOUSE   | P02798 | C54, C56      | C[+125]SQGC[+57]IC[+57]K                   | HPDP     |
| MT2_MOUSE   | P02798 | C33           | SC[+329]C[+57]SC[+125]C[+57]PVGC[+57]AK    | IodoTMT6 |
| MT2_MOUSE   | P02798 | C33,C41       | SC[+329]C[+57]SC[+125]C[+57]PVGC[+329]AK   | IodoTMT6 |
| MT2_MOUSE   | P02798 | C33,C41       | SC[+329]C[+125]SC[+125]C[+57]PVGC[+329]AK  | IodoTMT6 |
| MT2_MOUSE   | P02798 | C34,C41       | SC[+125]C[+329]SC[+125]C[+125]PVGC[+329]AK | IodoTMT6 |
| MT2_MOUSE   | P02798 | C36,C41       | SC[+57]C[+125]SC[+329]C[+57]PVGC[+329]AK   | IodoTMT6 |
| MT2_MOUSE   | P02798 | C37,C41       | SC[+57]C[+57]SC[+125]C[+329]PVGC[+329]AK   | IodoTMT6 |
| MT2_MOUSE   | P02798 | C41           | SC[+57]C[+57]SC[+125]C[+57]PVGC[+329]AK    | IodoTMT6 |
| MT2_MOUSE   | P02798 | C41           | SC[+57]C[+125]SC[+57]C[+57]PVGC[+329]AK    | IodoTMT6 |
| MT2_MOUSE   | P02798 | C41           | SC[+125]C[+57]SC[+125]C[+57]PVGC[+329]AK   | IodoTMT6 |
| MT2_MOUSE   | P02798 | C41           | SC[+57]C[+57]SC[+125]C[+125]PVGC[+329]AK   | IodoTMT6 |
| MT2_MOUSE   | P02798 | C41           | SC[+125]C[+125]SC[+57]C[+57]PVGC[+329]AK   | IodoTMT6 |
| MT2_MOUSE   | P02798 | C41           | SC[+125]C[+125]SC[+125]C[+57]PVGC[+329]AK  | IodoTMT6 |
| MT2_MOUSE   | P02798 | C44           | C[+329]SQGC[+125]IC[+125]K                 | IodoTMT6 |
| MT2_MOUSE   | P02798 | C44           | C[+329]SQGC[+57]IC[+125]K                  | IodoTMT6 |
| MT2_MOUSE   | P02798 | C50           | C[+125]SQGC[+125]IC[+329]K                 | IodoTMT6 |
| MT2_MOUSE   | P02798 | C50           | C[+125]SQGC[+57]IC[+329]K                  | IodoTMT6 |
| MTCH2_MOUSE | Q791V5 | C79           | LC[+57]SGVLGTVVHGK                         | HPDP     |
| MTMR2_MOUSE | Q9Z2D1 | C95           | DVTYIC[+57]PFTGAVR                         | HPDP     |
| MTMR7_MOUSE | Q9Z2C9 | C158          | VC[+57]DSYPTELYVPR                         | HPDP     |
| MTMR7_MOUSE | Q9Z2C9 | C68           | QATTATGC[+57]PLLIR                         | HPDP     |
| MTMR9_MOUSE | Q9Z2D0 | C392          | C[+125]AQSAYC[+57]SSK                      | HPDP     |
| MTMRA_MOUSE | Q7TPM9 | C703          | SGPLEAC[+57]YAELDQSR                       | HPDP     |

|             |        |               |                                                    |          |
|-------------|--------|---------------|----------------------------------------------------|----------|
| MTNB_MOUSE  | Q9WVQ5 | C187          | MAHAMNEYPDSC[+329]AVLVRR                           | IodoTMT6 |
| MTNB_MOUSE  | Q9WVQ5 | C187          | MAHAMNEYPDSC[+329]AVLVR                            | IodoTMT6 |
| MTR1L_MOUSE | O88495 | C363          | AC[+57]VAVEGTPR                                    | HPDP     |
| MTUS1_MOUSE | Q5HZI1 | C823          | SLC[+57]IQTQTAPDVLSSER                             | HPDP     |
| MYG_MOUSE   | P04247 | C67           | HGC[+57]TVLTALGTILK                                | HPDP     |
| MYH9_MOUSE  | Q8VDD5 | C740          | QAC[+57]VLMIK                                      | HPDP     |
| MYH9_MOUSE  | Q8VDD5 | C816          | NC[+57]AAYLR                                       | HPDP     |
| MYH9_MOUSE  | Q8VDD5 | C896          | LQLQEQLQAETELC[+57]AEAEELR                         | HPDP     |
| MYH9_MOUSE  | Q8VDD5 | C988          | KLEEDQIIM[+16]EDQNC[+329]K                         | IodoTMT6 |
| MYH9_MOUSE  | Q8VDD5 | C988          | LKKLEEDQIIMEDQNC[+329]K                            | IodoTMT6 |
| MYH9_MOUSE  | Q8VDD5 | C988          | KLEEDQIIMEDQNC[+329]K                              | IodoTMT6 |
| MYH9_MOUSE  | Q8VDD5 | C988          | LEEDQIIM[+16]EDQNC[+329]K                          | IodoTMT6 |
| MYH9_MOUSE  | Q8VDD5 | C988          | LEEDQIIMEDQNC[+329]K                               | IodoTMT6 |
| MYL3_MOUSE  | P09542 | C191          | LMAGQEDSNGC[+57]INYEAFVK                           | HPDP     |
| MYL6_MOUSE  | Q60605 | C32           | ILYSQC[+57]GDVM[+16]R                              | HPDP     |
| MYL6_MOUSE  | Q60605 | C32           | ILYSQC[+57]GDVMR                                   | HPDP     |
| MYO1E_MOUSE | E9Q634 | C960          | AAPAPPGC[+57]HQNGVIR                               | HPDP     |
| MYOF_MOUSE  | Q69ZN7 | C1540         | ELPDSVPQEC[+57]TVR                                 | HPDP     |
| MYOF_MOUSE  | Q69ZN7 | C409          | VC[+57]TNIER                                       | HPDP     |
| MYOF_MOUSE  | Q69ZN7 | C409          | KVC[+57]TNIER                                      | HPDP     |
| MYOM1_MOUSE | Q62234 | C656          | C[+57]DVGAENWQR                                    | HPDP     |
| MYOTI_MOUSE | Q9JIF9 | C321          | ASDAGPYAC[+57]VAR                                  | HPDP     |
| MYPC3_MOUSE | O70468 | C1204         | SIIAGYNAILC[+125]C[+57]AVR                         | HPDP     |
| NAL9B_MOUSE | Q66X22 | C891,C907,C90 | QLC[+57]EALSHPNC[+329]NLEC[+57]LGLDLCEFTSDC[+329]C | IodoTMT6 |
| NARFL_MOUSE | Q7TMW6 | C270          | DVDC[+57]VLTTGEVFR                                 | HPDP     |
| NDKA_MOUSE  | P15532 | C145          | SC[+329]AQNWIYE                                    | IodoTMT6 |
| NDKB_MOUSE  | Q01768 | C145          | SC[+329]AHDWVYE                                    | IodoTMT6 |
| NDUV1_MOUSE | Q91YT0 | C125          | YLVVNADEGEPGTC[+329]K                              | IodoTMT6 |
| NET1_MOUSE  | O09118 | C17           | M[+16]MRAVWEALAALAAVAC[+329]LVGAVR                 | IodoTMT6 |
| NEXN_MOUSE  | Q7TPW1 | C585          | GETYC[+125]LYLPETFPEDGGGEYMC[+329]K                | IodoTMT6 |
| NHRF1_MOUSE | P70441 | C201          | IVEVNGVC[+57]M[+16]EGK                             | HPDP     |
| NHRF1_MOUSE | P70441 | C201          | IVEVNGVC[+57]MEGK                                  | HPDP     |

|             |        |            |                                                     |          |
|-------------|--------|------------|-----------------------------------------------------|----------|
| NID1_MOUSE  | P10493 | C1232      | C[+329]PDNTLGVDC[+57]IER                            | IodoTMT6 |
| NIPA_MOUSE  | Q80YV2 | C405       | LC[+57]SSSSSDTSPR                                   | HPDP     |
| NIT1_MOUSE  | Q8VDK1 | C247, C255 | AIESQC[+57]YVIAAAQC[+57]GR                          | HPDP     |
| NKAI4_MOUSE | Q9JMG4 | C8,C14     | C[+329]TLLALC[+329]ALQLVTALER                       | IodoTMT6 |
| NL1B2_MOUSE | A1Z198 | C330       | QIFGIKALMMVESNPVLLTLCEVPWVCWLVC[+329]NC[+125]I      | IodoTMT6 |
| NMDZ1_MOUSE | P35438 | C459       | KVIC[+125]TGPNDTSPGSPRHTVPQC[+125]C[+125]YGFC[+329] | IodoTMT6 |
| NOP58_MOUSE | Q6DFW4 | C439       | TYDPSGDSTLPTC[+57]SK                                | HPDP     |
| NPAS4_MOUSE | Q8BGD7 | C149       | QQLTM[+16]PSALDADRLFRC[+329]R                       | IodoTMT6 |
| NRDC_MOUSE  | Q8BHG1 | C685       | AFDC[+57]PETEYPAK                                   | HPDP     |
| NSF_MOUSE   | P46460 | C11        | C[+57]PTDELSLSNC[+125]AVVNEK                        | HPDP     |
| NSF_MOUSE   | P46460 | C11, C21   | C[+57]PTDELSLSNC[+57]AVVNEK                         | HPDP     |
| NTKL_MOUSE  | Q9EQC5 | C241       | SLVTHYC[+329]ELVGANPKVRPNPARFLQNCR                  | IodoTMT6 |
| NUMA1_MOUSE | E9Q7G0 | C728       | AADALKEQQC[+57]R                                    | HPDP     |
| NUMB_MOUSE  | Q9QZS3 | C176       | EC[+57]GVTATFDASR                                   | HPDP     |
| OBSCN_MOUSE | A2AAJ9 | C3100      | GTLTLQC[+57]EVSDPEAR                                | HPDP     |
| OBSCN_MOUSE | A2AAJ9 | C3864      | SLTIADAGEYLC[+57]TC[+125]GQEK                       | HPDP     |
| OBSCN_MOUSE | A2AAJ9 | C4816      | DLTVEDTGEYSC[+57]TC[+125]GQER                       | HPDP     |
| OBSL1_MOUSE | D3YYU8 | C149       | GEEVVLTC[+57]QVGGGLPEPK                             | HPDP     |
| OC90_MOUSE  | Q9Z0L3 | C371       | QVGC[+329]LHGRRSQSSVVCEDHMAK                        | IodoTMT6 |
| OSBL1_MOUSE | Q91XL9 | C520       | DC[+57]GGGDALSNGIK                                  | HPDP     |
| OSBP1_MOUSE | Q3B7Z2 | C222       | VEDLSTC[+57]NDLIAK                                  | HPDP     |
| OXSM_MOUSE  | Q9D404 | C86        | NIPC[+57]SVAAYVPR                                   | HPDP     |
| P3H1_MOUSE  | Q3V1T4 | C648       | TVTAEVQPQC[+57]GR                                   | HPDP     |
| PA2G4_MOUSE | P50580 | C49        | SLVEASSSGVSVLSLC[+57]EK                             | HPDP     |
| PACN2_MOUSE | Q9WVE8 | C465       | IEDEDEQGWC[+329]K                                   | IodoTMT6 |
| PACN2_MOUSE | Q9WVE8 | C465       | AGDELTKIEDEDEQGWC[+329]K                            | IodoTMT6 |
| PAFA_MOUSE  | Q60963 | C290       | C[+329]GVALDPWMYPVNEELYSR                           | IodoTMT6 |
| PAFA_MOUSE  | Q60963 | C290       | C[+329]GVALDPWM[+16]YPVNEELYSR                      | IodoTMT6 |
| PAFA_MOUSE  | Q60963 | C290       | C[+329]GVALDPWMYPVNEELYSR                           | IodoTMT6 |
| PARK7_MOUSE | Q99LX0 | C53        | DVMIC[+57]PDTSLEDAK                                 | HPDP     |
| PARK7_MOUSE | Q99LX0 | C58        | DVM[+16]IC[+57]PDTSLEDAK                            | HPDP     |
| PARK7_MOUSE | Q99LX0 | C53        | DVMIC[+329]PDTSLEDAK                                | IodoTMT6 |

|             |        |            |                                   |          |
|-------------|--------|------------|-----------------------------------|----------|
| PAXI_MOUSE  | Q8VI36 | C108       | NSSASNTQDGVGSLC[+329]SR           | IodoTMT6 |
| PCBP1_MOUSE | P60335 | C109       | LVVPATQC[+57]GSLIGK               | HPDP     |
| PCCB_MOUSE  | Q99MN9 | C271       | AFDNDVDALC[+57]NLR                | HPDP     |
| PDC6I_MOUSE | Q9WU78 | C40        | FIQQTYPSPGGEEQAQYC[+57]R          | HPDP     |
| PDIA5_MOUSE | Q921X9 | C449, C454 | IAC[+57]AAVDC[+57]VK              | HPDP     |
| PDIA5_MOUSE | Q921X9 | C449, C454 | KIAC[+57]AAVDC[+57]VK             | HPDP     |
| PDIA5_MOUSE | Q921X9 | C463       | DKNQDLC[+57]QQEAVK                | HPDP     |
| PDLI1_MOUSE | O70400 | C73        | GC[+57]ADNM[+16]TLTVSR            | HPDP     |
| PDLI1_MOUSE | O70400 | C73        | GC[+57]ADNMTLTVSR                 | HPDP     |
| PDLI5_MOUSE | Q8CI51 | C73        | AC[+57]TGSLNMTLQR                 | HPDP     |
| PDLI5_MOUSE | Q8CI51 | C73        | AC[+57]TGSLNM[+16]TLQR            | HPDP     |
| PEA15_MOUSE | Q62048 | C27        | SAC[+57]KEDIPSEK                  | HPDP     |
| PEG10_MOUSE | Q7TN75 | C521       | SIVFNSDYC[+57]R                   | HPDP     |
| PEG10_MOUSE | Q7TN75 | C521       | SIVFNSDYC[+329]R                  | IodoTMT6 |
| PEG3_MOUSE  | Q3URU2 | C383       | EC[+57]GETFSR                     | HPDP     |
| PELP1_MOUSE | Q9DBD5 | C202       | AC[+57]VTYFPR                     | HPDP     |
| PELP1_MOUSE | Q9DBD5 | C523       | NANSDVC[+57]AAALR                 | HPDP     |
| PEPD_MOUSE  | Q11136 | C183       | FNVNNTILHPEIVEC[+329]R            | IodoTMT6 |
| PEPD_MOUSE  | Q11136 | C183       | EASFEGISKFNVNNTILHPEIVEC[+329]R   | IodoTMT6 |
| PEPD_MOUSE  | Q11136 | C482       | TVEEIEAC[+125]MAGC[+329]DK        | IodoTMT6 |
| PEPD_MOUSE  | Q11136 | C58        | YC[+329]TDTSIIFR                  | IodoTMT6 |
| PEPL1_MOUSE | Q6NSR8 | C357       | LVLADGVSYAC[+57]K                 | HPDP     |
| PFD3_MOUSE  | P61759 | C8         | DGC[+57]GLETAAGNGR                | HPDP     |
| PFKAP_MOUSE | Q9WUA3 | C410       | SNC[+57]NVAVINVGAPAAGMNA AVR      | HPDP     |
| PFKAP_MOUSE | Q9WUA3 | C410       | SNC[+329]NVAVINVGAPAAGMNA AVR     | IodoTMT6 |
| PGBM_MOUSE  | Q05793 | C1628      | TC[+57]ESLGAGGYR                  | HPDP     |
| PGBM_MOUSE  | Q05793 | C2456      | DITLEC[+57]ISSGEPR                | HPDP     |
| PGBM_MOUSE  | Q05793 | C1530      | ALEVEEC[+329]R                    | IodoTMT6 |
| PGBM_MOUSE  | Q05793 | C2456      | DITLEC[+329]ISSGEPR               | IodoTMT6 |
| PGBM_MOUSE  | Q05793 | C479       | EADQGAYTC[+329]EAMNSR             | IodoTMT6 |
| PGBM_MOUSE  | Q05793 | C892       | GSLGTSGETC[+329]R                 | IodoTMT6 |
| PGFS_MOUSE  | Q9DB60 | C44,C47    | AC[+57]VVAGLRRFGC[+329]MVC[+329]R | IodoTMT6 |

|             |        |       |                                    |          |
|-------------|--------|-------|------------------------------------|----------|
| PGS1_MOUSE  | P28653 | C77   | VVQC[+57]SDLGLK                    | HPDP     |
| PHAG1_MOUSE | Q3U1F9 | C423  | ESDYESIGDLQQC[+57]R                | HPDP     |
| PHAG1_MOUSE | Q3U1F9 | C423  | ESDYESIGDLQQC[+329]R               | IodoTMT6 |
| PIPNB_MOUSE | P53811 | C187  | ELANTPDC[+57]PR                    | HPDP     |
| PKHA7_MOUSE | Q3UIL6 | C969  | DREQGQC[+57]VNGDLK                 | HPDP     |
| PKHM1_MOUSE | Q7TSI1 | C464  | SAAGLC[+57]TSPVQDTPESR             | HPDP     |
| PKP3_MOUSE  | Q9QY23 | C129  | SAVDLTC[+57]SR                     | HPDP     |
| PLEC_MOUSE  | Q9QXS1 | C1386 | QEIQAVPIANC[+57]QAAR               | HPDP     |
| PLEC_MOUSE  | Q9QXS1 | C4267 | C[+125]ITDPQTGLC[+57]LLPLKEK       | HPDP     |
| PLEC_MOUSE  | Q9QXS1 | C4267 | C[+125]ITDPQTGLC[+57]LLPLK         | HPDP     |
| PLRG1_MOUSE | Q922V4 | C208  | C[+57]IAVEPGNQWFVTGSADR            | HPDP     |
| PLRG1_MOUSE | Q922V4 | C263  | SPYLFSC[+329]GEDK                  | IodoTMT6 |
| PLRG1_MOUSE | Q922V4 | C337  | C[+329]QAAEQIITGSHD TTIRLWDLVAGKTR | IodoTMT6 |
| PLRG1_MOUSE | Q922V4 | C337  | C[+329]QAAEQIITGSHD TTIR           | IodoTMT6 |
| PMGE_MOUSE  | P15327 | C145  | VC[+57]DVPLDQLPR                   | HPDP     |
| PP2AB_MOUSE | P63330 | C269  | C[+329]GNQAAIMELDDTLK              | IodoTMT6 |
| PP4P1_MOUSE | Q3TWL2 | C94   | VC[+57]QSPINVEGK                   | HPDP     |
| PP4R1_MOUSE | Q8K2V1 | C385  | LESLEGC[+57]AAK                    | HPDP     |
| PP6R3_MOUSE | Q922D4 | C815  | C[+329]TAPLTPSSSPEQR               | IodoTMT6 |
| PPBT_MOUSE  | P09242 | C119  | TYNTNAQVPDSAGTATAYLC[+329]GVK      | IodoTMT6 |
| PPIA_MOUSE  | P17742 | C161  | KITISDC[+57]GQL                    | HPDP     |
| PPIA_MOUSE  | P17742 | C161  | ITISDC[+57]GQL                     | HPDP     |
| PPIA_MOUSE  | P17742 | C161  | TSKKITISDC[+57]GQL                 | HPDP     |
| PPIA_MOUSE  | P17742 | C67   | IIPGFM[+16]C[+57]QGGDFTR           | HPDP     |
| PPIA_MOUSE  | P17742 | C161  | KITISDC[+329]GQL                   | IodoTMT6 |
| PPIA_MOUSE  | P17742 | C62   | IIPGFMC[+329]QGGDFTR               | IodoTMT6 |
| PPIG_MOUSE  | A2AR02 | C174  | ILSC[+57]GELIPK                    | HPDP     |
| PPIG_MOUSE  | A2AR02 | C308  | EC[+57]NPPNSQPASYQR                | HPDP     |
| PPME1_MOUSE | Q8BVQ5 | C238  | QC[+57]EGITSPEGSK                  | HPDP     |
| PPP5_MOUSE  | Q60676 | C404  | GVSC[+57]QFGPDVTK                  | HPDP     |
| PPP5_MOUSE  | Q60676 | C221  | EVLC[+329]KLSTLVETTLK              | IodoTMT6 |
| PPR3F_MOUSE | Q9JIG4 | C419  | ILPATC[+57]GLGGPPR                 | HPDP     |

|             |        |            |                                         |          |
|-------------|--------|------------|-----------------------------------------|----------|
| PR8A9_MOUSE | Q9CQ58 | C101       | AGTYC[+57]HSTLSNPPDR                    | HPDP     |
| PRAP1_MOUSE | Q80XD8 | C9         | RFLLATC[+329]LVAALLWEAGAAPAHQVPVK       | IodoTMT6 |
| PRD13_MOUSE | E9PZZ1 | C653       | THTGYKPLKC[+125]KVC[+329]LRPFGDPSNLNK   | IodoTMT6 |
| PRDX4_MOUSE | O08807 | C54        | ENEC[+329]HFYAGGQVYPGEASR               | IodoTMT6 |
| PRDX5_MOUSE | P99029 | C200       | ALNVEPDGTGLTC[+57]SLAPNILSQL            | HPDP     |
| PRDX5_MOUSE | P99029 | C96        | GVLFGVPGAFTPGC[+57]SK                   | HPDP     |
| PRDX6_MOUSE | O08709 | C47        | DFTPVC[+57]TTELGR                       | HPDP     |
| PRDX6_MOUSE | O08709 | C47        | DFTPVC[+329]TTELGR                      | IodoTMT6 |
| PRP19_MOUSE | Q99KP6 | C298       | IWSVPNTSC[+57]VQVVR                     | HPDP     |
| PRS40_MOUSE | A6H6T1 | C60        | STLSLSEVC[+57]GK                        | HPDP     |
| PRS6A_MOUSE | O88685 | C399       | C[+125]TDDFNGAQC[+329]K                 | IodoTMT6 |
| PRS7_MOUSE  | P46471 | C377       | LC[+57]PNSTGAEIR                        | HPDP     |
| PRS7_MOUSE  | P46471 | C389       | SVC[+57]TEAGMFAIR                       | HPDP     |
| PRS7_MOUSE  | P46471 | C389       | SVC[+57]TEAGM[+16]FAIR                  | HPDP     |
| PSA6_MOUSE  | Q9QUM9 | C154, C161 | C[+57]DPAGYYC[+57]GFK                   | HPDP     |
| PSA6_MOUSE  | Q9QUM9 | C167       | C[+125]DPAGYYC[+57]GFK                  | HPDP     |
| PSA6_MOUSE  | Q9QUM9 | C161       | C[+125]DPAGYYC[+329]GFK                 | IodoTMT6 |
| PSD13_MOUSE | Q9WVJ2 | C114       | SSDEAVILC[+329]KTAIGALK                 | IodoTMT6 |
| PTGR1_MOUSE | Q91YR9 | C251       | TGPC[+57]PQGPAPVVIYQQLR                 | HPDP     |
| PTN1_MOUSE  | P35821 | C32        | HEASDFPC[+57]K                          | HPDP     |
| PUR2_MOUSE  | Q64737 | C41        | QVLVAPGNAGTAC[+57]AGK                   | HPDP     |
| PUR4_MOUSE  | Q5SUR0 | C270       | FC[+57]DNSSAIQ GK                       | HPDP     |
| PUR9_MOUSE  | Q9CWJ9 | C434       | YTQSNSVC[+57]YAK                        | HPDP     |
| PURA2_MOUSE | P46664 | C58        | VVDLLAQDADIVC[+57]R                     | HPDP     |
| PZP_MOUSE   | Q61838 | C933       | EQTYNTLLC[+329]PQDTELQDNWSLELPPNVVEGSAR | IodoTMT6 |
| QCR1_MOUSE  | Q9CZ13 | C268       | VYEEDAVPGLTPC[+329]R                    | IodoTMT6 |
| RABL6_MOUSE | Q5U3K5 | C501       | VAPQQC[+57]SEPETK                       | HPDP     |
| RACK1_MOUSE | P68040 | C153       | YTVQDESHSEWVSC[+57]VR                   | HPDP     |
| RAE1L_MOUSE | Q8C570 | C106       | VFTASC[+57]DK                           | HPDP     |
| RB33B_MOUSE | O35963 | C48        | IIVIGDSNVGKTC[+329]LTYRFCAGR            | IodoTMT6 |
| RB6I2_MOUSE | Q99MI1 | C258       | TGEPC[+57]VAELTEENFQR                   | HPDP     |
| RBMS2_MOUSE | Q8VC70 | C217       | TPPGVAAPSDPLLC[+57]K                    | HPDP     |

|             |        |          |                                             |          |
|-------------|--------|----------|---------------------------------------------|----------|
| RBX1_MOUSE  | P62878 | C94      | QVC[+57]PLDNR                               | HPDP     |
| RENBP_MOUSE | P82343 | C250     | DGQVVLENVSEDGKELPGC[+57]LGR                 | HPDP     |
| RFLB_MOUSE  | Q5SVD0 | C88      | LC[+57]PLSFGEGVEFDPLPPK                     | HPDP     |
| RHG01_MOUSE | Q5FWK3 | C91      | IIVFSAC[+57]R                               | HPDP     |
| RHG10_MOUSE | Q6Y5D8 | C587     | TSPDTTFAEPTC[+57]LSASPPNAPPR                | HPDP     |
| RHG29_MOUSE | Q8CGF1 | C1152    | SSDSC[+57]PATAVR                            | HPDP     |
| RHOA_MOUSE  | Q9QUI0 | C164     | IGAFGYM[+16]EC[+57]SAK                      | HPDP     |
| RL12_MOUSE  | P35979 | C141     | EILGTAQSVGC[+57]NVDGR                       | HPDP     |
| RL12_MOUSE  | P35979 | C17      | C[+57]TGGEVGATSALAPK                        | HPDP     |
| RL12_MOUSE  | P35979 | C17      | C[+329]TGGEVGATSALAPK                       | IodoTMT6 |
| RL13A_MOUSE | P19253 | C38      | C[+57]JEGINISGNFYR                          | HPDP     |
| RL18A_MOUSE | P62717 | C64      | SSGEIVYC[+57]GQVFEK                         | HPDP     |
| RL18A_MOUSE | P62717 | C64      | SSGEIVYC[+329]GQVFEKSPLR                    | IodoTMT6 |
| RL18A_MOUSE | P62717 | C64      | SSGEIVYC[+329]GQVFEK                        | IodoTMT6 |
| RL23_MOUSE  | P62830 | C125     | EC[+57]ADLWPR                               | HPDP     |
| RL27A_MOUSE | P14115 | C144     | GVGGAC[+57]VLVA                             | HPDP     |
| RL28_MOUSE  | P41105 | C13      | NC[+57]SSFLIK                               | HPDP     |
| RL28_MOUSE  | P41105 | C13      | NC[+57]SSFLIKR                              | HPDP     |
| RL30_MOUSE  | P62889 | C92      | VC[+57]TLAIIDPGDSDIIR                       | HPDP     |
| RL30_MOUSE  | P62889 | C52      | LVILANNC[+329]PALR                          | IodoTMT6 |
| RL30_MOUSE  | P62889 | C92      | VC[+329]TLAIIDPGDSDIIR                      | IodoTMT6 |
| RL36_MOUSE  | P47964 | C48      | EVC[+57]GFAPYER                             | HPDP     |
| RL36A_MOUSE | P83882 | C72, C77 | LEC[+57]VEPNC[+57]R                         | HPDP     |
| RL37A_MOUSE | P61514 | C48      | YTC[+125]SFC[+57]GK                         | HPDP     |
| RL37A_MOUSE | P61514 | C42      | YTC[+125]SFC[+329]GK                        | IodoTMT6 |
| RL4_MOUSE   | Q9D8E6 | C101     | SGQGAFGNM[+16]C[+57]R                       | HPDP     |
| RL4_MOUSE   | Q9D8E6 | C208     | GPC[+57]IYDNGIHK                            | HPDP     |
| RL7A_MOUSE  | P12970 | C182     | MGVPYC[+57]IHK                              | HPDP     |
| RL9_MOUSE   | P51410 | C134     | TGVAC[+57]SVSQAQK                           | HPDP     |
| RLA0_MOUSE  | P14869 | C119     | AGAIAPC[+57]EVTVPAQNTGLGPEK                 | HPDP     |
| RLA0_MOUSE  | P14869 | C119     | AGAIAPC[+329]EVTVPAQNTGLGPEK                | IodoTMT6 |
| RLA0_MOUSE  | P14869 | C119     | AGAIAPC[+329]EVTVPAQNTGLGPEKTSFFQALGITTKISR | IodoTMT6 |

|             |        |            |                                                 |          |
|-------------|--------|------------|-------------------------------------------------|----------|
| RLA0_MOUSE  | P14869 | C119       | AGAIAPC[+329]EVTVPAQNTGLGPEKTSFFQALGITTK        | IodoTMT6 |
| RN126_MOUSE | Q91YL2 | C32        | C[+57]ESGFIEELPEETR                             | HPDP     |
| RPAP3_MOUSE | Q9D706 | C341       | DC[+57]TQAIVLDSYSK                              | HPDP     |
| RPB2_MOUSE  | Q8CFI7 | C221       | YAYTGEC[+57]R                                   | HPDP     |
| RPB2_MOUSE  | Q8CFI7 | C892       | DC[+57]STFLR                                    | HPDP     |
| RRAGC_MOUSE | Q99K70 | C376       | SC[+57]SHQTSAPSLK                               | HPDP     |
| RRAS2_MOUSE | P62071 | C55        | QC[+57]VIDDR                                    | HPDP     |
| RRBP1_MOUSE | Q99PL5 | C1327      | EAEETQNSLQAEC[+57]DQYR                          | HPDP     |
| RRBP1_MOUSE | Q99PL5 | C1327      | LREAEETQNSLQAEC[+57]DQYR                        | HPDP     |
| RRBP1_MOUSE | Q99PL5 | C1198      | LKELESQVSC[+329]LEK                             | IodoTMT6 |
| RRBP1_MOUSE | Q99PL5 | C1327      | LREAEETQNSLQAEC[+329]DQYR                       | IodoTMT6 |
| RRBP1_MOUSE | Q99PL5 | C1327      | EAEETQNSLQAEC[+329]DQYR                         | IodoTMT6 |
| RS11_MOUSE  | P62281 | C131       | DVQIGDIVTVGEC[+57]RPLSK                         | HPDP     |
| RS11_MOUSE  | P62281 | C60        | C[+329]PFTGNVSIR                                | IodoTMT6 |
| RS16_MOUSE  | P14131 | C25        | TATAVAHC[+57]K                                  | HPDP     |
| RS17_MOUSE  | P63276 | C35        | VC[+57]EEIAIIPSK                                | HPDP     |
| RS17_MOUSE  | P63276 | C35        | VC[+57]EEIAIIPSKK                               | HPDP     |
| RS27A_MOUSE | P62983 | C144, C155 | C[+57]C[+125]LTYC[+57]FNKPEDK                   | HPDP     |
| RS3_MOUSE   | P62908 | C119       | AC[+57]YGVLR                                    | HPDP     |
| RS3_MOUSE   | P62908 | C134       | GC[+57]EVVVSGK                                  | HPDP     |
| RS5_MOUSE   | P97461 | C66        | AQC[+57]PIVER                                   | HPDP     |
| RS6_MOUSE   | P62754 | C12        | LNISFPATGC[+57]QK                               | HPDP     |
| RS8_MOUSE   | P62242 | C100       | NC[+57]IVLIDSTPYR                               | HPDP     |
| RSSA_MOUSE  | P14206 | C163       | YVDIAIPC[+57]NNK                                | HPDP     |
| RTCB_MOUSE  | Q99LF4 | C193       | EGYAWAEDKEHC[+329]EEYGR                         | IodoTMT6 |
| RUS1_MOUSE  | Q91W34 | C12        | APLC[+57]TEQFGSGAPR                             | HPDP     |
| RUVB2_MOUSE | Q9WTM5 | C227       | FVQC[+57]PDGELQK                                | HPDP     |
| RUXF_MOUSE  | P62307 | C66        | C[+329]NNVLYIR                                  | IodoTMT6 |
| S2533_MOUSE | Q3TZX3 | C30        | ATGTQQKENTLLHLFAGGC[+125]GGTVGAIFTC[+329]PLEVIF | IodoTMT6 |
| S27A1_MOUSE | Q60714 | C80        | AGDTIPC[+57]IFQAVAR                             | HPDP     |
| S7A6O_MOUSE | Q7TPE5 | C27        | NAEPAEALVLAC[+57]K                              | HPDP     |
| SAC1_MOUSE  | Q9EP69 | C445       | NAWADNANAC[+57]AK                               | HPDP     |



|             |        |       |                                         |          |
|-------------|--------|-------|-----------------------------------------|----------|
| SAFB1_MOUSE | Q80YR5 | C219  | ILDILGETC[+329]K                        | IodoTMT6 |
| SAHH_MOUSE  | P50247 | C278  | EGNIFVTTTGC[+57]VDIILGR                 | HPDP     |
| SAHH_MOUSE  | P50247 | C297  | DDAIVC[+57]NIGHFDVEIDVK                 | HPDP     |
| SAHH3_MOUSE | Q68FL4 | C189  | GSSDFC[+57]VK                           | HPDP     |
| SAMH1_MOUSE | Q60710 | C342  | IC[+57]EVEYK                            | HPDP     |
| SAMH1_MOUSE | Q60710 | C614  | TSSC[+57]LQEVSK                         | HPDP     |
| SBP1_MOUSE  | P17563 | C31   | C[+125]GPGYSTPLEAMKGPREEIVYLPC[+329]IYR | IodoTMT6 |
| SBP1_MOUSE  | Q63836 | C31   | GPREEIVYLPC[+329]IYR                    | IodoTMT6 |
| SBP1_MOUSE  | Q63836 | C31   | EEIVYLPC[+329]IYR                       | IodoTMT6 |
| SC23A_MOUSE | Q01405 | C74   | AVLNPLC[+57]QVDYR                       | HPDP     |
| SC23B_MOUSE | Q9D662 | C425  | IAGAIGPC[+57]VSLNVK                     | HPDP     |
| SC23B_MOUSE | Q9D662 | C434  | GPC[+57]VSENELGVGGTSQWK                 | HPDP     |
| SC23B_MOUSE | Q9D662 | C74   | AILNPLC[+57]QVDYR                       | HPDP     |
| SC31A_MOUSE | Q3UPL0 | C173  | TQPPEDISC[+57]IAWNR                     | HPDP     |
| SC31A_MOUSE | Q3UPL0 | C60   | SC[+57]ATFSSSHR                         | HPDP     |
| SEC62_MOUSE | Q8BU14 | C82   | ESVVDYC[+57]NR                          | HPDP     |
| SF01_MOUSE  | Q64213 | C279  | SITNTTVC[+57]TK                         | HPDP     |
| SGT1_MOUSE  | Q9CX34 | C79   | SLELNPNNC[+57]TALLR                     | HPDP     |
| SH3G1_MOUSE | Q62419 | C277  | EPFELGELEQPNGGFPC[+57]APAPK             | HPDP     |
| SH3G1_MOUSE | Q62419 | C311  | SMPLDQPSC[+329]K                        | IodoTMT6 |
| SHRM2_MOUSE | A2ALU4 | C886  | SLATSC[+57]GEILSDR                      | HPDP     |
| SI1L1_MOUSE | Q8C0T5 | C585  | HSTARGLPLKEVLEHVIPELNVQC[+329]LR        | IodoTMT6 |
| SIA7B_MOUSE | P70277 | C65   | KSRLC[+329]QHSLSLAIQK                   | IodoTMT6 |
| SIDT2_MOUSE | Q8CIF6 | C430  | QYLC[+57]VADLAR                         | HPDP     |
| SLK_MOUSE   | O54988 | C1136 | DLQLQC[+57]EANVR                        | HPDP     |
| SMD2_MOUSE  | P62317 | C46   | NNTQVLINC[+329]R                        | IodoTMT6 |
| SMD2_MOUSE  | P62317 | C46   | EEEEFNTGPLSVLTQSVKNNTQVLINC[+329]R      | IodoTMT6 |
| SMD2_MOUSE  | P62317 | C46   | REEEEFNTGPLSVLTQSVKNNTQVLINC[+329]R     | IodoTMT6 |
| SMD3_MOUSE  | P62320 | C20   | VLHEAEGHIVTC[+329]ETNTGEVYR             | IodoTMT6 |
| SMU1_MOUSE  | Q3UKJ7 | C383  | TTEC[+57]SNTFK                          | HPDP     |
| SND1_MOUSE  | Q78PY7 | C152  | LSEC[+57]EEQAK                          | HPDP     |
| SODC_MOUSE  | P08228 | C147  | LAC[+57]GVIGIAQ                         | HPDP     |

|             |        |           |                                      |          |
|-------------|--------|-----------|--------------------------------------|----------|
| SODC_MOUSE  | P08228 | C147      | TGNAGSRLAC[+57]GVIGIAQ               | HPDP     |
| SODC_MOUSE  | P08228 | C7        | AVC[+329]VLKGDGPVQGTHFEQK            | IodoTMT6 |
| SPAS2_MOUSE | Q8K1N4 | C356      | FTC[+57]DVETLK                       | HPDP     |
| SPCS2_MOUSE | Q9CYN2 | C26       | SGGGGGSSGAGGGPSC[+57]GTSSSR          | HPDP     |
| SPEG_MOUSE  | Q62407 | C2710     | APC[+57]TYTLER                       | HPDP     |
| SPNS1_MOUSE | Q8R0G7 | C44       | SGELEVPDC[+57]EGLQR                  | HPDP     |
| SPSB3_MOUSE | Q571F5 | C271      | VIRSC[+329]ASSTSLQYLCCYRLR           | IodoTMT6 |
| SPTN1_MOUSE | P16546 | C1930     | VNDVC[+57]TNGQDLIK                   | HPDP     |
| SRB4D_MOUSE | A1L0T3 | C138      | QLGCGLALPVRPLAFGQGRGPIFLDNVEC[+329]R | IodoTMT6 |
| SRBP1_MOUSE | Q9WTN3 | C738,C753 | QAC[+329]LAQSGSVPLAMQWLC[+329]HPVGHR | IodoTMT6 |
| SRC_MOUSE   | P05480 | C408      | AANILVGENLVC[+329]K                  | IodoTMT6 |
| SRCRL_MOUSE | Q8BV57 | C6        | MRGLAC[+329]LLAM[+16]LVGIQAIER       | IodoTMT6 |
| SRP09_MOUSE | P49962 | C48       | VTDDLVC[+57]LVYR                     | HPDP     |
| SRRT_MOUSE  | Q99MR6 | C489      | EC[+57]ELSPGVNR                      | HPDP     |
| SRSF1_MOUSE | Q6PDM2 | C148      | EAGDVC[+57]YADVYR                    | HPDP     |
| SRSF3_MOUSE | P84104 | C6, C10   | DSC[+57]PLDC[+57]K                   | HPDP     |
| SSU72_MOUSE | Q9CY97 | C12       | VAVVC[+57]SSNQNR                     | HPDP     |
| STA5B_MOUSE | P42232 | C688      | YYTPVPC[+57]EPATAK                   | HPDP     |
| STIM1_MOUSE | P70302 | C49       | NTGASSGATSEESTEAEFC[+329]R           | IodoTMT6 |
| STIP1_MOUSE | Q60864 | C461      | ALDLSSC[+57]K                        | HPDP     |
| STIP1_MOUSE | Q60864 | C461      | ALDLSSC[+57]KEAADGYQR                | HPDP     |
| STK39_MOUSE | Q9Z1W9 | C461      | EGPC[+57]AVNLVLR                     | HPDP     |
| STRN4_MOUSE | P58404 | C569      | LASC[+57]SADGTVR                     | HPDP     |
| STX7_MOUSE  | O70439 | C28       | ITQC[+57]SVEIQR                      | HPDP     |
| STXB5_MOUSE | Q8K400 | C293      | KPEPC[+329]KPILKVELKTTR              | IodoTMT6 |
| SUCB1_MOUSE | Q9Z2I9 | C164      | IC[+125]NQVLVC[+57]ER                | HPDP     |
| SUCB1_MOUSE | Q9Z2I9 | C430      | ILAC[+57]DDLDEAAK                    | HPDP     |
| SYDC_MOUSE  | Q922B2 | C76       | QC[+57]FLVLR                         | HPDP     |
| SYEP_MOUSE  | Q8CGC7 | C697      | EAPC[+57]ILYIPDGHTK                  | HPDP     |
| SYEP_MOUSE  | Q8CGC7 | C910      | VAC[+57]QGEVVR                       | HPDP     |
| SYK_MOUSE   | Q99MN1 | C432      | AVEC[+57]PPPR                        | HPDP     |
| SYNPO_MOUSE | Q8CC35 | C686      | ASPAAAEAVPEWASC[+57]LK               | HPDP     |

|             |        |            |                                                   |          |
|-------------|--------|------------|---------------------------------------------------|----------|
| SYSM_MOUSE  | Q9JL8  | C425       | YGEVTSASNC[+57]TDFQSR                             | HPDP     |
| SYT2_MOUSE  | P46097 | C91        | IPLPPWALIAM[+16]AVVAGLLLLTCC[+57]FCIC[+57]KKCC[+3 | IodoTMT6 |
| SYTC_MOUSE  | Q9D0R2 | C266       | C[+125]GPLIDLC[+57]R                              | HPDP     |
| TALDO_MOUSE | Q93092 | C250       | ALAGC[+57]DFLTISPK                                | HPDP     |
| TARA_MOUSE  | Q99KW3 | C1491      | SC[+57]TDVTEYAVQR                                 | HPDP     |
| TARA_MOUSE  | Q99KW3 | C1921      | SFIASQGTGNSC[+57]GR                               | HPDP     |
| TARA_MOUSE  | Q99KW3 | C1930      | SSC[+57]ELEVLLR                                   | HPDP     |
| TARA_MOUSE  | Q99KW3 | C1491      | SC[+329]TDVTEYAVQR                                | IodoTMT6 |
| TB182_MOUSE | P58871 | C259       | LAC[+57]SEAPTDVSK                                 | HPDP     |
| TBA1B_MOUSE | P68368 | C295       | AYHEQLSVAEITNAC[+329]FEPANQM[+16]VK               | IodoTMT6 |
| TBA1B_MOUSE | P68368 | C295       | AYHEQLSVAEITNAC[+329]FEPANQMVK                    | IodoTMT6 |
| TBCD_MOUSE  | Q8BYA0 | C665       | AVQSLKQIHQQLC[+329]DRHLYR                         | IodoTMT6 |
| TBPL1_MOUSE | P62340 | C68        | IIC[+57]TGATSEEEAK                                | HPDP     |
| TCPA_MOUSE  | P11983 | C147       | DC[+57]LINA AK                                    | HPDP     |
| TCPA_MOUSE  | P11983 | C357       | IC[+57]DDELILIK                                   | HPDP     |
| TCPA_MOUSE  | P11983 | C357       | IC[+57]DDELILIKNTK                                | HPDP     |
| TCPD_MOUSE  | P80315 | C295       | TGC[+57]NVLLIQK                                   | HPDP     |
| TCPG_MOUSE  | P80318 | C403       | NLQDAM[+16]QVC[+57]R                              | HPDP     |
| TCPH_MOUSE  | P80313 | C370       | TC[+57]TIILR                                      | HPDP     |
| TERA_MOUSE  | Q01853 | C105       | LGDVISIQPC[+57]PDVK                               | HPDP     |
| TERA_MOUSE  | Q01853 | C69, C77   | EAVC[+57]IVLSDDTC[+57]SDEK                        | HPDP     |
| TERA_MOUSE  | Q01853 | C184       | VVETDPSPYC[+125]IVAPD TVIHC[+329]EGEPIKR          | IodoTMT6 |
| TERA_MOUSE  | Q01853 | C69        | EAVC[+329]IVLSDDTC[+125]SDEKIR                    | IodoTMT6 |
| TERA_MOUSE  | Q01853 | C69        | EAVC[+329]IVLSDDTC[+125]SDEK                      | IodoTMT6 |
| TERA_MOUSE  | Q01853 | C77        | EAVC[+125]IVLSDDTC[+329]SDEK                      | IodoTMT6 |
| TERA_MOUSE  | Q01853 | C77        | EAVC[+125]IVLSDDTC[+329]SDEKIR                    | IodoTMT6 |
| TGM2_MOUSE  | P21981 | C27        | DHHTADLC[+57]QEK                                  | HPDP     |
| TGM2_MOUSE  | P21981 | C370       | SEGTYC[+57]C[+125]GPVSVR                          | HPDP     |
| TGM2_MOUSE  | P21981 | C370, C371 | SEGTYC[+57]C[+57]GPVSVR                           | HPDP     |
| TGM2_MOUSE  | P21981 | C553       | YSGC[+57]L TESNLIK                                | HPDP     |
| TGM2_MOUSE  | P21981 | C10        | C[+329]DLEIQANGR                                  | IodoTMT6 |
| THIM_MOUSE  | Q8BWT1 | C382       | YAVGSAC[+57]IGGGQGIALIIQNTA                       | HPDP     |

|             |        |                |                                               |          |
|-------------|--------|----------------|-----------------------------------------------|----------|
| THIM_MOUSE  | Q8BWT1 | C92, C103, C10 | LC[+57]GSGFQSIIVSGC[+57]QEIC[+57]SK           | HPDP     |
| TIF1B_MOUSE | Q62318 | C628           | LASPSGSTSSGLEVVAPEVTSAPVSGPGILDDSATIC[+329]R  | IodoTMT6 |
| TINAL_MOUSE | Q99JR5 | C445           | GTNEC[+57]DIETFVLGVWGR                        | HPDP     |
| TINAL_MOUSE | Q99JR5 | C326           | C[+329]PNGQVDSNDIYQVTPAYR                     | IodoTMT6 |
| TIPRL_MOUSE | Q8BH58 | C87            | VAC[+57]AEEWQESR                              | HPDP     |
| TITIN_MOUSE | A2ASS6 | C13473         | C[+57]EVSKDVPVK                               | HPDP     |
| TITIN_MOUSE | A2ASS6 | C14323         | ILIIQNAQLEDAGSYNC[+57]R                       | HPDP     |
| TITIN_MOUSE | A2ASS6 | C16418         | C[+57]NEHLVPVLTYTAK                           | HPDP     |
| TITIN_MOUSE | A2ASS6 | C18063         | EC[+57]MYTIPK                                 | HPDP     |
| TITIN_MOUSE | A2ASS6 | C18869         | VPDLLEGCG[+57]QYEFR                           | HPDP     |
| TITIN_MOUSE | A2ASS6 | C20340         | C[+57]NAAAQLIR                                | HPDP     |
| TITIN_MOUSE | A2ASS6 | C2115          | VVGKPDPEC[+57]EWYK                            | HPDP     |
| TITIN_MOUSE | A2ASS6 | C21280         | C[+57]DPPVISNITK                              | HPDP     |
| TITIN_MOUSE | A2ASS6 | C21561         | YILTLENSC[+57]GK                              | HPDP     |
| TITIN_MOUSE | A2ASS6 | C21561         | YILTLENSC[+57]GKK                             | HPDP     |
| TITIN_MOUSE | A2ASS6 | C21780         | DLPDLC[+57]YLAK                               | HPDP     |
| TITIN_MOUSE | A2ASS6 | C21834         | VSVESTAVNTTLVVYDC[+57]QK                      | HPDP     |
| TITIN_MOUSE | A2ASS6 | C24876         | SYAAVVTNC[+57]HK                              | HPDP     |
| TITIN_MOUSE | A2ASS6 | C24969         | NTDKWSEC[+57]AR                               | HPDP     |
| TITIN_MOUSE | A2ASS6 | C26841         | AAADEWTTC[+57]TPPSGLQGK                       | HPDP     |
| TITIN_MOUSE | A2ASS6 | C28709         | ELQTNALVC[+57]VENSTDLASILIK                   | HPDP     |
| TITIN_MOUSE | A2ASS6 | C29432         | YTVILDNAVC[+57]R                              | HPDP     |
| TITIN_MOUSE | A2ASS6 | C33458         | EVYDYCYC[+57]R                                | HPDP     |
| TITIN_MOUSE | A2ASS6 | C34371         | FSC[+57]DTDGEPVPTVTWLR                        | HPDP     |
| TITIN_MOUSE | A2ASS6 | C6675          | SSC[+57]TAVVDVSDR                             | HPDP     |
| TITIN_MOUSE | A2ASS6 | C9704          | AEDQGQYTC[+57]K                               | HPDP     |
| TJAP1_MOUSE | Q9DCD5 | C335           | NSPLPNC[+57]TYATR                             | HPDP     |
| TKT_MOUSE   | P40142 | C468           | AVELAANTKGIC[+329]FIR                         | IodoTMT6 |
| TLN1_MOUSE  | P26039 | C1087          | C[+57]TQDLGNSTK                               | HPDP     |
| TLN1_MOUSE  | P26039 | C956           | ASAGPQPLLVQSC[+57]K                           | HPDP     |
| TLR11_MOUSE | Q6R5P0 | C743           | TLLFSFLATNCPHGTEFWGFLTSFILLLLLIIPLISC[+329]PK | IodoTMT6 |
| TMM65_MOUSE | Q4VAE3 | C31            | SLRPGPAAAPRLPSWCC[+329]CGRGLLALGVPGGPR        | IodoTMT6 |

|             |        |           |                                                   |          |
|-------------|--------|-----------|---------------------------------------------------|----------|
| TNNC1_MOUSE | P19123 | C35       | AAFDIFVLGAEDGC[+57]ISTK                           | HPDP     |
| TNR19_MOUSE | Q9JLL3 | C189      | DTALAAVICSALATVLLALLILC[+329]VIYCK                | IodoTMT6 |
| TNR19_MOUSE | Q9JLL3 | C25       | MALKVLPLHRTVLFAAILFLLHLAC[+329]K                  | IodoTMT6 |
| TNS2_MOUSE  | Q8CGB6 | C548      | LLGGC[+57]GVASAGR                                 | HPDP     |
| TOM34_MOUSE | Q9CYG7 | C222      | YSESLLC[+57]SSLESATYSNR                           | HPDP     |
| TPIS_MOUSE  | P17751 | C177      | VSHALAEGLGVIAC[+57]IGEK                           | HPDP     |
| TPIS_MOUSE  | P17751 | C268      | IYGGSVTGATC[+57]K                                 | HPDP     |
| TPIS_MOUSE  | P17751 | C268      | SNVNDGVAQSTRIYGGSVTGATC[+57]K                     | HPDP     |
| TPIS_MOUSE  | P17751 | C268      | IYGGSVTGATC[+329]K                                | IodoTMT6 |
| TPM1_MOUSE  | P58771 | C190      | C[+329]AELEEELK                                   | IodoTMT6 |
| TPM1_MOUSE  | P58771 | C190      | C[+329]AELEEELKTVTNNLK                            | IodoTMT6 |
| TPM2_MOUSE  | P58774 | C190      | C[+329]GDLEEELKIVTNNLK                            | IodoTMT6 |
| TPM4_MOUSE  | P58774 | C190      | C[+329]GDLEEELK                                   | IodoTMT6 |
| TPM4_MOUSE  | Q6IRU2 | C247      | EENVGLHQTLQTLNELNC[+329]I                         | IodoTMT6 |
| TPP2_MOUSE  | Q64514 | C150      | VALAEAC[+57]R                                     | HPDP     |
| TPP2_MOUSE  | Q64514 | C209      | AC[+57]VDSNENGDLSK                                | HPDP     |
| TPP2_MOUSE  | Q64514 | C967      | GAGPGC[+57]YLAGSLTLSK                             | HPDP     |
| TPSN_MOUSE  | Q9R233 | C118      | SLSPEQNC[+57]PR                                   | HPDP     |
| TRFE_MOUSE  | Q921I1 | C373      | TKC[+57]DEWSIISEGK                                | HPDP     |
| TRFE_MOUSE  | Q921I1 | C260      | KPVDQYEDC[+329]YLAR                               | IodoTMT6 |
| TRFE_MOUSE  | Q921I1 | C350      | NQQEGVC[+329]PEGSIDNSPVK                          | IodoTMT6 |
| TRFE_MOUSE  | Q921I1 | C373      | TKC[+329]DEWSIISEGK                               | IodoTMT6 |
| TRFE_MOUSE  | Q921I1 | C373      | C[+329]DEWSIISEGK                                 | IodoTMT6 |
| TRFE_MOUSE  | Q921I1 | C386,C395 | IEC[+329]ESAETTEDC[+329]IEK                       | IodoTMT6 |
| TRFE_MOUSE  | Q921I1 | C395      | IEC[+57]ESAETTEDC[+329]IEK                        | IodoTMT6 |
| TRFE_MOUSE  | Q921I1 | C395      | TKC[+57]DEWSIISEGKIEC[+57]ESAETTEDC[+329]IEK      | IodoTMT6 |
| TRFE_MOUSE  | Q921I1 | C472      | SC[+329]HTGVDR                                    | IodoTMT6 |
| TRFE_MOUSE  | Q921I1 | C67       | KTSYPDC[+329]IK                                   | IodoTMT6 |
| TRFE_MOUSE  | Q921I1 | C67       | TSYPDC[+329]IK                                    | IodoTMT6 |
| TRI42_MOUSE | Q9D2H5 | C18,C27   | ETAMCVC[+57]SPCC[+57]TWQRC[+125]C[+329]PRLFSCLCC[ | IodoTMT6 |
| TXND5_MOUSE | Q91W90 | C107,C114 | VDC[+329]TADSDVC[+329]SAQGVR                      | IodoTMT6 |
| TXND5_MOUSE | Q91W90 | C114      | VDC[+57]TADSDVC[+329]SAQGVR                       | IodoTMT6 |

|             |        |            |                                             |          |
|-------------|--------|------------|---------------------------------------------|----------|
| U3IP2_MOUSE | Q91WM3 | C460       | NSVC[+57]IPLR                               | HPDP     |
| UBA6_MOUSE  | Q8C7R4 | C298       | TFC[+57]FEPLESQIK                           | HPDP     |
| UBA6_MOUSE  | Q8C7R4 | C347       | C[+57]QQDSDELLK                             | HPDP     |
| UBA6_MOUSE  | Q8C7R4 | C546       | VC[+57]PATESIYSDEFYTK                       | HPDP     |
| UBAC1_MOUSE | Q8VDI7 | C134       | ATANLPAC[+57]STDR                           | HPDP     |
| UBE2O_MOUSE | Q6ZPJ3 | C309       | SFC[+57]PGGTDSVSPPPSITQENLGR                | HPDP     |
| UBE2O_MOUSE | Q6ZPJ3 | C365       | IAWEC[+57]PEK                               | HPDP     |
| UBP15_MOUSE | Q8R5H1 | C264       | NSNYC[+57]LPSYTAYK                          | HPDP     |
| UBP16_MOUSE | Q99LG0 | C24        | SAPDTVASESAEPVC[+57]R                       | HPDP     |
| UBP4_MOUSE  | P35123 | C758       | SLYFDEQESEAC[+329]EK                        | IodoTMT6 |
| UBP47_MOUSE | Q8BY87 | C856       | AGGDSGNVDDDC[+57]ER                         | HPDP     |
| UBR1_MOUSE  | O70481 | C279       | AGVYATC[+57]QEAK                            | HPDP     |
| UBR1_MOUSE  | O70481 | C996       | SC[+57]LVVATTSGLEC[+125]VK                  | HPDP     |
| UBR2_MOUSE  | Q6WKZ8 | C112       | VEPTYSC[+57]R                               | HPDP     |
| UPP1_MOUSE  | P52624 | C132       | C[+57]SNITIIR                               | HPDP     |
| USO1_MOUSE  | Q9Z1Z0 | C802       | SQLC[+57]SQSLEITR                           | HPDP     |
| UTP20_MOUSE | Q5XG71 | C2058      | KPAAPVPDARLPPQSC[+329]LLLPATPVRGGPK         | IodoTMT6 |
| VAT1_MOUSE  | Q62465 | C99        | AC[+57]GLNFADLM[+16]GR                      | HPDP     |
| VATG1_MOUSE | Q9CR51 | C69        | EAAALGSHGSC[+57]SSEVEK                      | HPDP     |
| VAV2_MOUSE  | Q60992 | C196, C197 | SC[+57]C[+57]LLEIQETEAKE                    | HPDP     |
| VDAC1_MOUSE | Q60932 | C245       | YQVDPDAC[+329]FSAK                          | IodoTMT6 |
| VDAC2_MOUSE | Q60930 | C48        | SC[+329]SGVEFSTSGSNTDTGK                    | IodoTMT6 |
| VDAC3_MOUSE | Q60931 | C36        | SC[+329]SGVEFSTSGHAYTDTGK                   | IodoTMT6 |
| VIGLN_MOUSE | Q8VDJ3 | C53        | AAC[+57]LESAQEPAGAWSNK                      | HPDP     |
| VIME_MOUSE  | P20152 | C328       | QVQSLTC[+329]EVDALK                         | IodoTMT6 |
| VIME_MOUSE  | P20152 | C328       | QVQSLTC[+329]EVDALKGTNESLER                 | IodoTMT6 |
| VPP2_MOUSE  | P15920 | C315       | KMKAIYHMLNMC[+329]SFDVTNK                   | IodoTMT6 |
| VPS8_MOUSE  | Q0P5W1 | C1293      | EC[+57]TLEVEGQTR                            | HPDP     |
| VTNC_MOUSE  | P29788 | C179       | GQYC[+329]YELDETA VRPGYPK                   | IodoTMT6 |
| VTNC_MOUSE  | P29788 | C473       | SIAQYWLGC[+329]PTSEK                        | IodoTMT6 |
| VWDE_MOUSE  | Q6DFV8 | C217       | ISVELLGSVFC[+125]RC[+329]TFDVSPNTSVGFLIAWSR | IodoTMT6 |
| WASF2_MOUSE | Q8BH43 | C27        | QTLPSDTSELEC[+329]R                         | IodoTMT6 |

|             |        |            |                                          |          |
|-------------|--------|------------|------------------------------------------|----------|
| WDR1_MOUSE  | O88342 | C225       | VC[+57]ALGESK                            | HPDP     |
| WDR1_MOUSE  | O88342 | C382       | M[+16]TVNESEQLVSC[+329]SMDDTVR           | IodoTMT6 |
| WDR1_MOUSE  | O88342 | C382       | MTVNESEQLVSC[+329]SMDDTVR                | IodoTMT6 |
| WDR5_MOUSE  | P61965 | C195       | DGSLIVSSSYDGLC[+57]R                     | HPDP     |
| WDR5_MOUSE  | P61965 | C195       | DGSLIVSSSYDGLC[+329]R                    | IodoTMT6 |
| WFD11_MOUSE | A2A5H7 | C8         | KPSWFPC[+329]LVFLC[+125]M[+16]LLLSALGGRK | IodoTMT6 |
| XDH_MOUSE   | Q00519 | C970, C974 | C[+57]WDEC[+57]IASSQYQAR                 | HPDP     |
| XIRP1_MOUSE | O70373 | C997       | ISGSTPC[+57]PPPSR                        | HPDP     |
| XPO7_MOUSE  | Q9EPK7 | C43        | ALVEFTNSPDC[+57]LSK                      | HPDP     |
| XPP3_MOUSE  | B7ZMP1 | C491       | IEDDVVVTQDSPLILSADC[+57]PK               | HPDP     |
| XRN2_MOUSE  | Q9DBR1 | C276       | DC[+57]EGLPR                             | HPDP     |
| YAP1_MOUSE  | P46938 | C328       | C[+57]QELALR                             | HPDP     |
| YIPF5_MOUSE | Q9EQQ2 | C42        | QYAGC[+57]DYSQQGR                        | HPDP     |
| Z354C_MOUSE | Q571J5 | C248       | LHTGEKPYKC[+329]SECGKSFSHR               | IodoTMT6 |
| ZFPL1_MOUSE | Q9DB43 | C56        | LC[+57]NTPLASR                           | HPDP     |
| ZN106_MOUSE | O88466 | C7,C10     | KC[+329]ILC[+329]HIVYGSK                 | IodoTMT6 |
| ZN363_MOUSE | Q9CR50 | C243       | LC[+57]DSYNTAQAGGR                       | HPDP     |
| ZN689_MOUSE | Q8BKK5 | C263       | THTGEEKPHQC[+329]PSCGRRFAYPSSLAIHQ       | IodoTMT6 |
| ZYX_MOUSE   | Q62523 | C376       | QSVAVNESC[+57]GK                         | HPDP     |
| ZYX_MOUSE   | Q62523 | C379       | C[+57]NQPLAR                             | HPDP     |

**Figure S1. (A) Systolic, (B) diastolic and (C) mean arterial blood pressure were determined in non-pregnant and at 17.5 days (d) of gestation (N=5-8 mothers per group) in C57Bl/6J (B6), GSNOR<sup>-/-</sup> (KO), and in mice treated with ascorbate (Asc).**

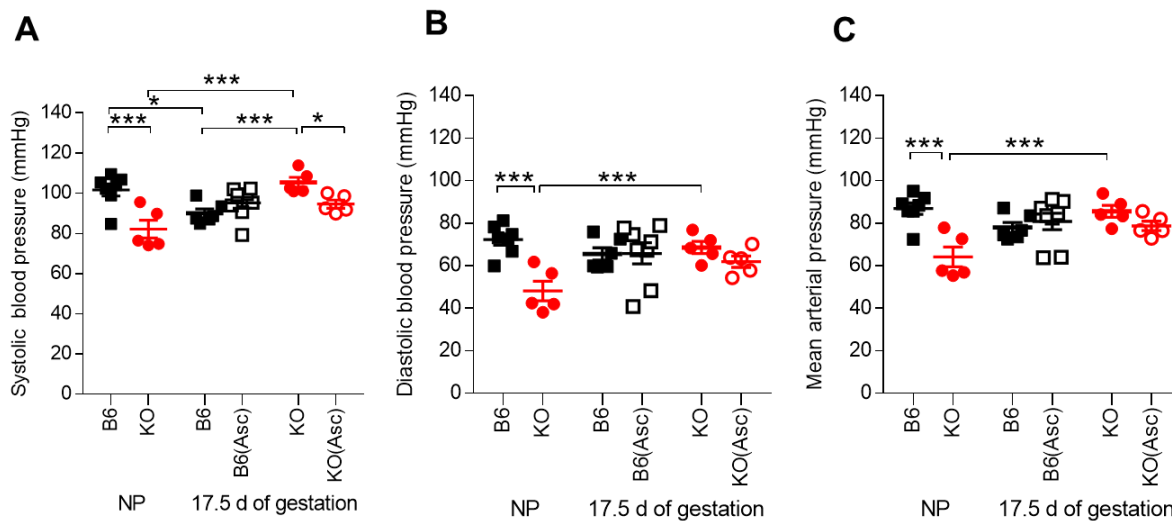

Systolic, diastolic and mean arterial pressure were significantly lower in KO mice prior to pregnancy. During pregnancy, blood pressure increased in KO mice. Ascorbate treatment prevented the onset of systolic blood pressure in KO mice at 17.5 d of gestation. Results are shown as mean  $\pm$  SEM. \* $P < 0.05$ , \*\*\* $P < 0.001$ . Two-way ANOVA with Newman-Keuls for post hoc analysis.



**Figure S2. Umbilical arterial and venous blood flow (A, C) and blood flow normalized to fetal weight (B, D) were determined using micro-ultrasound in isoflurane-anesthetized embryos on day 17.5 of gestation in C57Bl/6J (B6), GSNOR<sup>-/-</sup> (KO), and in mice treated with ascorbate (Asc).**

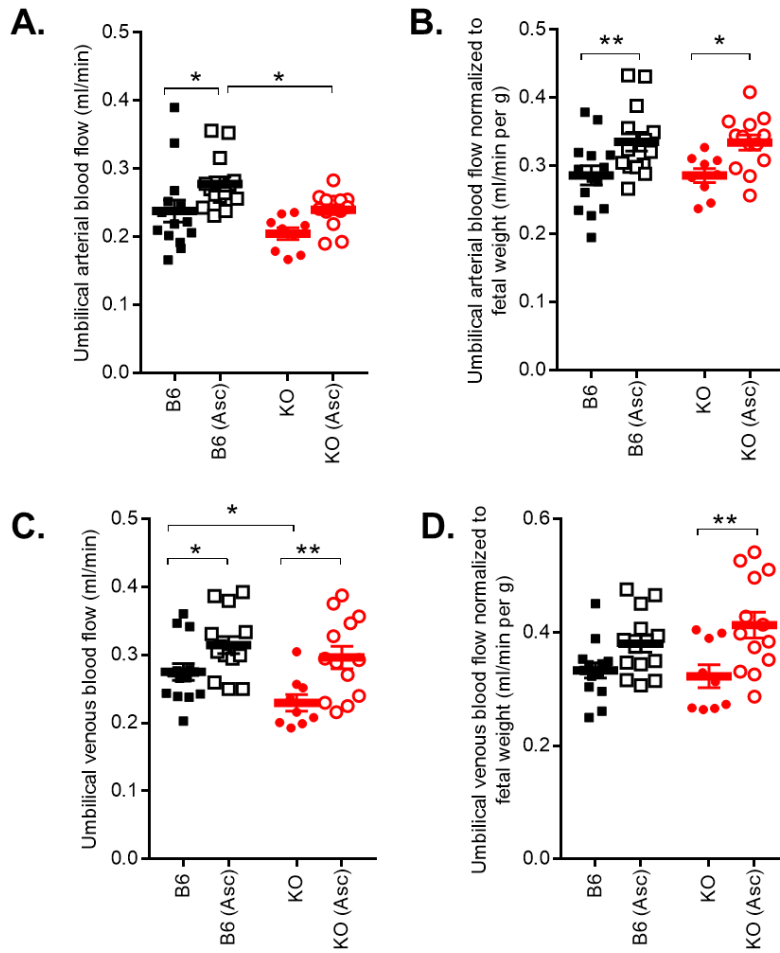

Umbilical venous blood flow was significantly lower in KO fetuses at 17.5 d of gestation and was rescued with Asc treatment. Results are shown as mean  $\pm$  SEM. \* $P < 0.05$ , \*\* $P < 0.01$ . Two-way ANOVA with Newman-Keuls for post hoc analysis.

**Figure S3. Pathway analysis of list of proteins nitrosylated in GSNOR<sup>-/-</sup> placentas as compared to B6 placentas determined using dual-labelling mass spectrometry analysis was created using String-DB.**

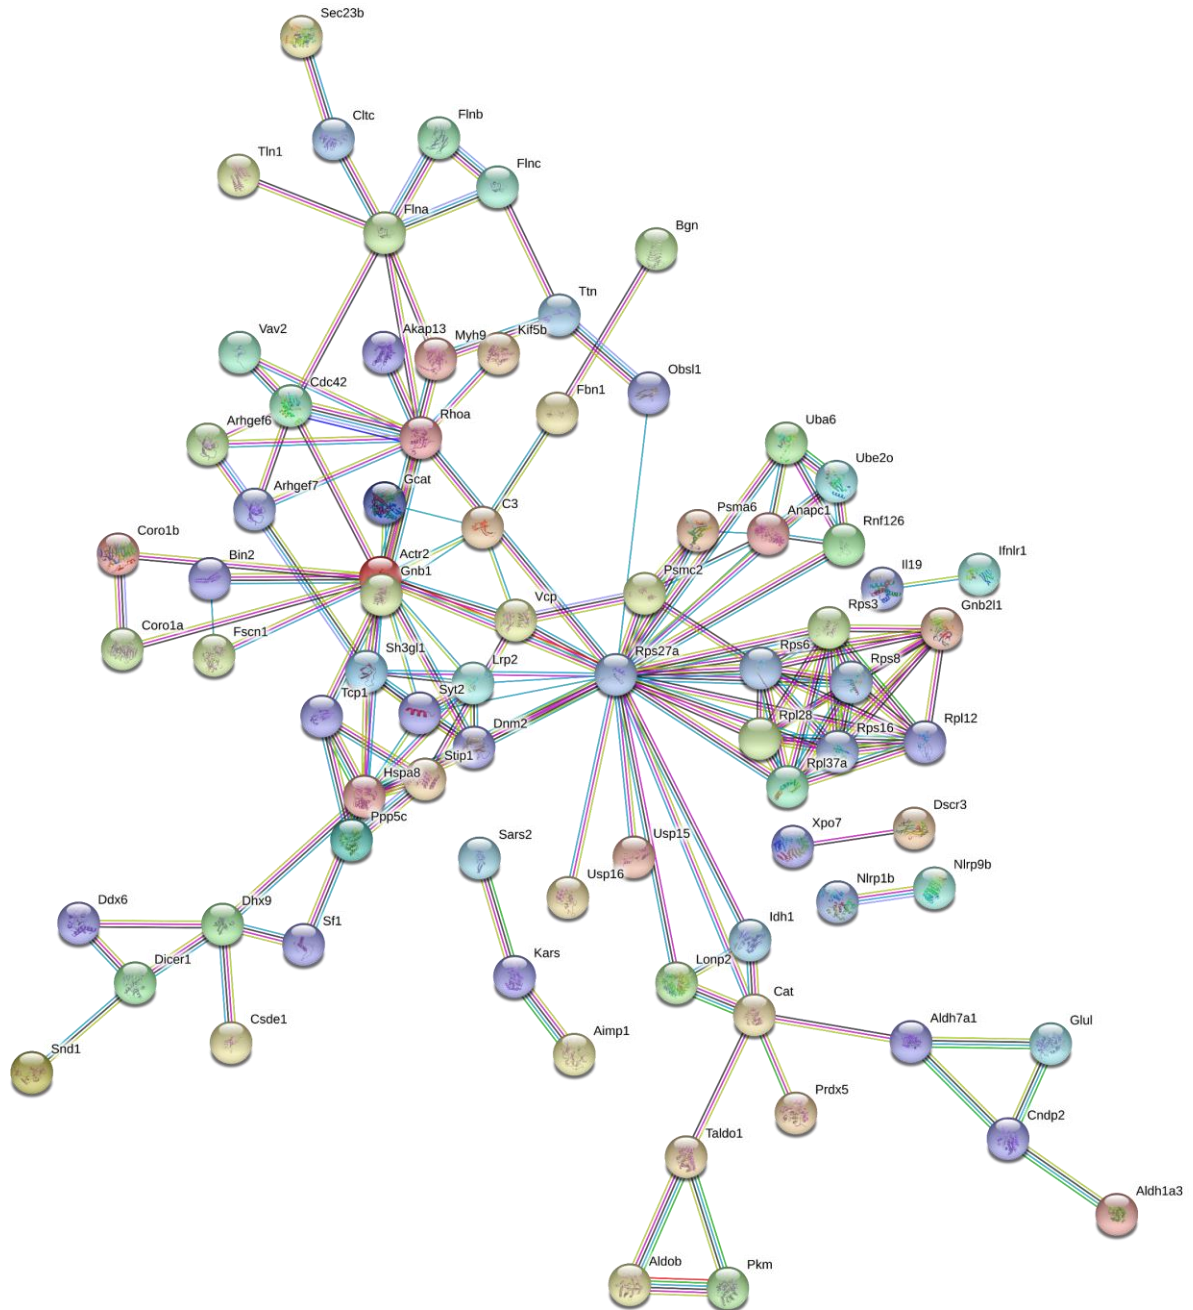

All SNO-proteins were detected in at least 2 of 5 placentas/group. The number in the observation column is the number of placentas that showed expression of that particular SNO-protein for that group. These proteins correlate to data shown in Table S2.
